# Supplementary material for: Discovery and Analysis of Evolutionarily Conserved Intronic Splicing Regulatory Elements
Source: PLoS Genet. 2007 May 25;3(5):e85. doi: 10.1371/journal.pgen.0030085 (PMC1877881; doi:10.1371/journal.pgen.0030085)
Supplement: Dataset S1 — (225 KB XLS) [file pgen.0030085.sd002.xls]

## Sheet: Classes.z
		Window start (relative to exon)
Downstream	ISRE	0	10	20	30	40	50	60	70	80	90	100	110	120	130	140	150	160	170	180	190	200	210	220	230	240	250	260	270	280	290	300	310	320	330	340
Downstream	1	71.4122	-2.5217	-2.225	-3.1955	-1.1973	-1.7387	-1.1589	-2.3485	-3.1302	-3.3939	-2.4982	-3.9374	-5.5565	-3.4794	-3.3027	-3.1251	-4.8979	-3.3601	-2.9198	-3.9413	-2.1847	-2.7724	-4.229	-2.5201	-4.372	-4.1256	-3.0027	-3.0373	-1.2361	-2.0054	-1.2855	-3.3425	-2.8057	-3.0041	-3.46
Downstream	2	18.6157	0.7138	-1.07	1.0566	1.2303	0.3632	-0.7663	-0.8941	-1.0296	-1.3289	-1.8015	-1.2796	-0.5642	0.1407	-2.096	-2.1505	-0.0389	1.1891	1.2178	-0.0369	-0.383	-0.079	0.4725	0.0866	0.6214	1.0251	-0.7141	-1.5434	-1.0322	-0.6026	-1.0041	-0.4422	-1.1744	-0.81	-1.1677
Downstream	3	17.1513	-1.1633	-0.6786	-0.3709	-0.8861	-0.9554	-1.0677	-1.2119	0.1203	0.5989	0.111	-1.8754	-1.5205	-0.9407	-1.4558	-0.2635	-0.731	-0.6724	0.3129	0.0524	0.6016	0.2246	-0.4768	-0.8761	-0.9069	-0.2826	-1.693	-1.4491	0.3057	0.1063	-0.395	0.1315	-0.4951	0.611	0.2508
Downstream	4	-6.3761	-3.4907	-0.5433	-1.5937	-0.3996	-0.5982	-0.9449	1.1713	1.65	0.182	1.0936	1.332	0.0069	0.3671	-0.3359	0.3903	0.7616	1.1132	-0.0741	0	-0.1566	-0.5287	-0.5507	-1.1567	0.0177	1.2855	2.6487	0.798	-0.4256	-0.4475	0.1375	-1.1301	0.6844	-0.0483	-0.051
Downstream	5	-10.4835	7.6228	9.3149	9.5617	8.7716	9.7847	10.2725	11.0239	10.6394	9.5234	10.3229	5.728	7.4612	5.856	5.0066	4.9301	7.0482	9.8618	8.8743	10.3353	5.8179	5.9733	7.441	9.1531	6.7031	8.0724	6.773	6.7122	8.2942	6.6889	6.4604	7.7152	8.493	8.8944	8.8955
Downstream	6	10.8667	1.5032	2.768	2.1818	1.721	1.8242	1.8518	0.1552	0.5454	1.3052	1.6021	1.2394	-0.1127	1.2468	1.3214	-0.602	-0.7615	-1.2196	-0.9347	-1.2814	-1.4824	-1.7404	-2.0457	-1.0465	-0.8566	0.7637	-1.0351	-1.0727	0.089	-1.0926	-1.7589	-0.9572	-0.1817	0.2208	0.919
Downstream	7	-0.5908	4.329	5.4623	4.2118	8.0787	6.7669	8.7284	7.323	8.2489	7.1044	7.6748	8.0199	6.7232	7.1794	8.1206	7.9769	7.4322	7.267	7.0083	4.3201	5.7501	6.5343	7.9309	10.0033	7.7807	7.194	7.498	13.3167	7.5018	5.7797	6.3126	5.8062	7.2051	6.0243	6.3856
Downstream	8	-12.4039	-3.5205	-0.4289	-0.19	-1.1329	-1.7469	-0.2681	-0.0605	0.2914	-0.1712	-0.5357	-0.7546	-2.2358	-0.0898	-0.9247	-1.6278	-3.8204	-2.8686	-2.0833	-0.3582	-0.1643	-0.6962	-1.503	-1.2539	-0.7309	-1.7404	-2.1997	-1.7374	-1.607	-1.0522	-0.2007	0.7721	0.5543	0.4581	0.5395
Downstream	9	11.3137	28.6718	31.6568	25.7441	21.6431	15.0385	25.0999	25.8914	21.859	28.8064	20.4907	25.3612	12.4009	10.4959	13.5792	15.2455	13.7631	14.9947	13.8745	13.1557	22.569	14.8824	14.3005	15.7936	14.1551	13.0352	16.3372	17.5448	22.9801	15.2783	13.324	20.7878	15.6063	16.6565	14.4829
Downstream	10	-10.6389	0.0313	-0.068	1.4467	1.5032	0.2753	1.2125	2.2041	0.875	-0.395	-2.0289	-1.4822	-2.3074	-0.2102	-0.239	-0.523	0.21	-1.0947	0.6895	-0.4626	-1.1824	-0.8737	-1.142	-2.3539	-0.8441	0.5427	1.8471	1.3364	1.5044	0.7158	0.7554	-0.1858	-0.3316	0	0.1365
Downstream	11	-5.5442	0.876	1.1627	0.1309	-0.7152	-0.7971	-0.3072	-0.5989	-2.048	-0.9671	0.9287	-0.7728	-0.3893	-0.611	-0.2005	-0.677	0.8694	1.0376	0.2364	-0.9139	-0.4589	0.111	0.754	-0.7288	-0.116	0.0551	-0.9835	0.248	-0.3482	0.4601	-0.0209	-0.5424	0.314	0.7585	0.0102
Downstream	12	-15.6205	-2.8419	-5.2067	-3.7921	-2.8574	-1.8927	-1.2131	-1.7521	-1.8166	-2.4014	-1.5446	-2.9511	-3.2124	-2.7552	-2.2507	-1.9311	-2.4295	-2.2697	-2.2396	-1.0468	-1.4022	-2.2209	-4.1135	-2.0892	-2.4778	-2.3803	-1.1663	-1.7308	-2.4095	-1.4662	-0.8133	-1.1667	-3.7933	-3.3086	-2.0815
Downstream	13	1.5321	2.6609	1.7767	2.8023	1.1177	1.3219	5.4043	3.9845	4.7293	3.5406	5.9735	3.0049	3.7833	2.6532	4.6351	3.1966	4.7174	5.9154	3.3161	2.0538	2.921	2.3268	2.9677	3.8887	5.0553	1.9172	1.5496	0.0459	1.8243	3.5673	2.8702	4.0614	3.501	1.9912	0.6035
Downstream	14	28.5615	0.2421	-0.1792	0.107	0.3033	0.3696	-0.195	0.6927	2.7765	4.6773	3.3472	-0.6019	-0.6996	-0.4101	-0.0476	-0.1071	-0.2905	0.558	1.2383	1.5508	0.4139	0.7885	0.5006	1.4176	1.227	1.991	2.6298	6.324	0.0848	0.1193	1.2221	1.563	2.5199	1.7721	0.3076
Downstream	15	-3.401	9.652	6.0291	5.4806	6.6647	7.1099	5.8444	7.7067	3.2223	5.851	5.2931	6.3315	8.0327	8.2754	5.5909	4.5115	3.6779	3.1964	4.3056	2.8817	4.038	4.8156	4.7117	5.0886	6.6213	6.2465	3.9745	3.8789	4.4605	6.7004	6.844	9.0549	9.491	3.3857	3.1378
Downstream	16	12.9979	-2.5329	-3.2639	-3.2208	-3.7015	-3.1202	-2.4811	-2.6427	-3.0953	-4.5061	-1.8706	-2.2179	-1.9927	-3.3642	-2.2221	-2.5494	-2.189	-2.7251	-2.5834	-4.0236	-2.477	-4.5226	-2.3962	-2.3989	-3.1066	-2.2377	-2.9762	-3.7019	-2.3878	-2.8398	-2.4588	-2.6104	-2.0526	-2.454	-2.4153
Downstream	17	-1.9125	2.5439	3.4304	4.3323	3.0956	1.4366	0.9522	1.1634	3.727	1.7173	0.3068	-0.4718	-0.1326	-1.3087	-0.0774	-0.3831	0.0157	-1.2274	-0.8638	0.2362	0.0084	-2.5547	-1.324	-0.4248	0.132	-0.2462	-0.7399	0.8097	0.6856	0.3057	1.6046	0.3947	1.0736	0.8928	1.2227
Downstream	18	5.4711	11.031	7.6724	9.3828	9.8684	15.6729	12.1297	8.7562	9.5852	9.0814	12.6209	5.593	9.406	8.9915	14.8772	8.48	8.5582	6.8437	5.2536	5.5824	9.87	9.4086	7.7453	5.94	6.5885	6.7699	3.1985	7.504	5.6599	8.7406	8.3523	9.7747	6.4527	6.433	9.6534
Downstream	19	2.3971	3.4594	3.9054	3.6465	2.4003	2.9681	5.2442	3.567	3.2714	2.9011	1.9316	5.4326	2.924	3.2941	2.812	3.4296	2.4538	3.0943	3.0146	4.3477	5.6183	3.9618	4.0716	0.2611	1.8699	3.9454	7.4138	5.9686	3.7744	3.4135	5.8213	4.3328	3.1612	5.4113	6.3656
Downstream	20	11.2762	28.7756	34.0367	27.8322	32.4843	20.5126	28.2334	19.0732	29.281	31.3431	21.8752	17.2255	20.8247	17.023	18.3532	9.4217	14.8754	13.6111	14.8828	6.8971	12.7252	10.9471	8.2985	8.169	9.3036	10.2631	5.7054	6.4846	5.7481	10.1085	8.1311	10.0163	9.4925	6.9342	3.6989
Downstream	21	7.7262	9.989	6.5912	6.9924	5.8251	6.8183	5.5308	5.5598	7.4389	6.0867	3.824	7.8212	6.5484	10.9395	9.8622	6.3514	7.3168	5.3557	5.1907	4.8968	4.3485	4.5998	4.2574	5.2279	4.4339	5.1254	4.0854	3.8978	4.3378	6.3808	6.5423	8.139	3.75	5.4942	3.2873
Downstream	22	-5.4661	-3.3153	-1.9779	-2.5612	-1.2251	-1.1403	-3.163	-1.344	-0.9415	-2.4715	-3.909	-1.7474	-1.2679	-0.9513	-2.8337	-1.4129	-1.836	-2.6183	-1.3181	-0.4326	0.473	-2.7203	-1.4472	-1.0478	-1.7823	-1.6837	-0.2956	-0.6855	-0.3257	0.2487	0.3425	0.2822	-0.5691	-0.7	-0.8698
Downstream	23	4.6453	4.8895	5.2441	2.1728	2.8489	1.5195	3.3572	2.4018	4.7005	3.2097	4.3789	6.662	4.5062	6.1328	5.1735	4.4771	4.2641	4.0572	4.9307	6.4923	7.1721	3.1708	4.6328	2.5869	4.9987	5.8096	6.0329	6.3807	3.3714	4.3149	0.2472	2.5157	3.1068	4.1329	2.9553
Downstream	24	6.534	12.2575	5.5697	7.9894	8.0876	14.1933	16.4365	6.468	7.2777	6.74	8.8232	9.2875	10.845	9.958	11.6315	8.5557	7.9071	5.0646	6.9277	7.4449	5.0079	7.0576	11.1945	8.9177	4.7041	8.0681	6.6545	8.4472	5.1073	6.7114	6.8061	7.4087	9.7556	5.2859	7.962
Downstream	25	-4.7751	-5.8691	-3.0091	-2.9462	-4.9843	-1.9865	-2.3028	-3.9957	-2.3113	-2.0925	-1.1156	-0.6243	-0.0485	0.4677	0.0221	-1.6235	-1.811	-2.5372	-1.6603	-2.1156	-2.8334	-1.6096	-1.3269	-1.2729	-2.6032	-0.5239	-1.4016	-0.2482	0.2381	1.4679	1.0069	0.381	-2.1917	-0.9806	-0.6704
Downstream	26	95.9329	-5.6857	-5.2339	-5.4265	-4.5434	-4.7795	-4.7763	-4.8611	-5.169	-4.1075	-5.2133	-3.0166	-4.4908	-3.232	-4.6448	-4.3636	-4.3059	-3.2544	-2.9742	-2.8761	-3.1338	-2.8899	-3.8867	-4.3006	-3.1376	-5.0678	-3.9223	-2.5983	-2.5174	-3.0846	-3.3196	-3.3813	-3.6265	-3.6015	-2.5849
Downstream	27	62.4236	-1.8979	-2.7292	-2.1728	-2.719	-2.2057	-0.5305	0.0653	-1.1796	-1.9097	-1.4646	-1.2592	-2.5168	-0.7325	-1.75	-1.9131	-2.7716	-1.3633	-1.0471	-1.4403	-2.383	-2.7042	-2.8367	-1.5067	-1.9627	-1.3512	-1.5439	-2.5798	-1.7907	-2.7053	-2.1512	-1.6106	-1.6856	-1.1003	-0.113
Downstream	28	1.4744	5.4469	6.1629	6.9895	6.2658	3.953	4.1196	4.6399	5.0221	4.3481	2.7393	7.4732	5.7112	5.3354	5.4273	4.3011	4.7395	3.7908	4.6567	4.9332	6.7744	6.1267	4.7301	5.0405	8.3233	8.3647	7.4291	3.6039	5.2168	7.9867	7.2512	7.2469	5.8169	4.1946	4.3192
Downstream	29	-3.1693	0.8429	2.0793	6.4038	11.5578	10.2987	4.137	1.5265	1.5856	0.623	2.3074	3.3853	0.8933	0.6145	-0.838	-1.062	-2.2796	-2.3443	-0.6478	-0.4084	-0.8629	-0.6739	-0.3579	-2.8124	-1.8142	-1.3842	-0.9596	-1.7939	0.0088	-0.6243	-1.4441	-1.5747	-2.1215	-1.6581	-1.721
Downstream	30	0.6405	14.041	19.6101	13.4631	14.0631	12.638	17.7266	12.7264	15.1464	12.2717	12.1541	20.0551	15.373	13.2212	8.5606	26.302	10.5909	12.9008	12.4447	11.3545	13.0432	10.2262	11.9303	13.7737	9.6492	9.5662	11.3945	9.6691	9.9639	10.4896	12.2689	17.1397	12.5842	12.6439	10.6307
Downstream	31	-4.1653	-1.2498	-0.3087	0.531	-0.2947	-0.0413	0.1818	1.659	1.9198	1.4763	0.3831	1.0925	-0.3238	-0.0092	-0.1764	-1.0691	-3.1094	-1.7669	-2.1938	-1.9623	-1.1301	-0.6555	-0.5732	1.2761	2.0206	0.5725	-1.3077	-1.6687	-0.9783	-1.3884	0.1318	1.0023	-0.3788	-0.6963	0.7003
Downstream	32	-1.0518	2.9127	3.1542	4.434	4.8192	4.4994	2.5212	4.1385	3.1118	3.5262	3.6398	2.8536	2.2929	3.1727	2.8348	12.9767	4.0474	5.4166	3.7078	3.0394	3.6886	9.5004	3.9246	4.2677	4.3644	5.4231	4.8469	2.8539	3.5971	3.5797	5.1991	2.3322	2.091	3.2877	3.9092
Downstream	33	-2.2532	3.8469	3.9716	3.5308	2.8858	3.6046	4.8271	6.6477	4.0674	4.0089	3.059	4.7478	3.8365	3.6989	5.366	7.6038	6.0874	7.0009	5.9636	6.27	7.1293	5.4402	3.6378	4.7729	6.7607	4.7738	6.4138	4.8625	6.7625	9.7409	5.3995	6.4329	4.7934	4.1816	4.9285
Downstream	34	-1.6827	0.7911	3.4729	2.015	3.6135	3.2494	1.567	-0.7158	0.6185	-0.8083	-0.4403	0.3229	-0.6072	-1.4823	-0.2031	0.836	1.2671	0.6269	-0.4908	0.0953	0.8573	1.122	0.5703	2.5123	-0.0801	-0.2398	0.5313	0.3688	0.8526	0.0546	1.4454	2.8766	1.5622	0.7065	0.4272
Downstream	35	-5.0314	-0.8772	0.1613	1.3845	1.0145	0.8917	2.1661	1.8126	0.3433	0.1495	-0.7761	-1.1662	-0.2587	-0.8692	-0.098	0.2255	0.887	0.3375	0.747	-0.774	0.9773	0.062	0.5252	-0.4402	-0.0104	0.8145	2.0502	2.1169	3.6353	1.2139	0.7846	-0.716	-1.0978	0.7795	0.338
Downstream	36	3.9108	9.7006	5.1453	12.5345	9.2784	8.5733	6.6601	9.1673	6.662	6.4584	9.4466	12.2754	7.3577	8.3797	6.4653	7.1586	7.3238	7.1654	9.7916	5.9038	8.9886	9.6267	11.6212	10.1483	7.1368	10.9325	6.9488	7.3734	6.5383	8.8705	7.5052	6.7414	7.4244	8.2311	10.486
Downstream	37	3.9609	6.1771	5.1596	3.9211	9.3115	6.9324	6.7192	6.7642	7.9812	6.8122	5.0086	5.1885	8.0755	4.5111	7.0772	4.9729	6.8159	5.5151	6.5117	4.8777	5.6338	4.0856	6.7799	7.8841	7.9318	6.2051	4.3432	2.6329	4.5247	7.1063	8.6846	5.3833	5.2237	5.3925	5.8055
Downstream	38	7.1334	3.2116	1.1474	1.1635	1.4376	1.8072	1.2587	1.4002	2.4992	2.5453	1.3716	2.4934	1.7893	2.2717	1.8833	3.2859	3.3351	3.1789	2.2911	0.7858	0.6354	3.1699	3.0806	3.0376	2.7092	3.008	3.1848	3.5807	2.9777	2.5147	1.7073	1.1376	2.2634	2.1582	1.0215
Downstream	39	7.7142	-2.0963	-0.6554	0.8905	1.8222	1.861	1.6789	0.2421	0.2279	-0.7978	1.032	0.862	0.2281	1.218	0.7765	0.3854	-2.3495	-1.555	-1.0648	-0.7251	-2.5251	-1.7286	-2.0165	-2.2217	-2.9221	-3.0444	-1.036	-1.6145	-1.1333	-1.8652	-2.5405	-1.6379	-0.6317	-1.1031	-0.5236
Downstream	40	78.3147	8.0227	9.3483	5.0373	5.4182	6.3057	12.4119	8.2173	8.6487	8.4145	10.3513	7.8588	9.6489	13.1145	8.9817	8.2443	7.4029	8.2486	7.4829	8.3367	7.6058	9.1236	7.16	5.7534	5.4789	9.9126	7.8366	5.9683	4.7045	5.5387	7.0257	6.6805	7.2577	6.2075	5.3302
Downstream	41	5.4721	7.5625	8.9303	6.2069	10.9764	11.2493	8.2731	11.1714	10.1579	7.9054	7.0082	4.6316	6.9402	7.1099	5.92	5.4846	4.8913	5.5525	7.8506	11.4407	7.6712	8.8518	16.2609	8.2312	5.8962	10.0219	9.9894	11.9186	10.2406	8.5412	7.3006	10.7144	5.4374	4.7886	7.068
Downstream	42	-7.3979	-3.5542	-2.7543	-3.4876	-2.4612	-3.3861	-3.6666	-2.8257	-2.2801	-2.4381	-2.823	-2.2746	-1.5762	-1.2115	-2.2661	-1.9788	-2.8175	-1.5837	-1.7464	-1.1315	-2.5519	-2.0547	-5.849	-2.2861	-2.1066	-2.609	-2.1879	-1.9578	-1.4267	-1.451	-1.1862	-1.6465	-0.5014	-1.726	-2.5868
Downstream	43	89.4341	-2.7828	-1.921	-2.9643	-3.2032	-3.0707	-1.1297	-1.435	-1.8996	-2.8327	-3.8785	-3.2754	-2.2937	-2.6669	-2.7824	-3.2473	-2.362	-2.5553	-2.0265	-2.7917	-2.7679	-2.7584	-3.0517	-1.8235	-1.7268	-1.4309	-1.5754	-2.5143	-2.4231	-3.119	-1.9751	-1.4562	-1.1746	-0.6292	0.625
Downstream	44	-10.4031	-9.652	-6.4902	-5.9322	-6.5052	-5.0019	-5.685	-5.7389	-5.4406	-7.5603	-8.2543	-5.3703	-6.7189	-10.7619	-6.482	-6.5737	-4.8878	-8.3163	-4.4088	-6.3798	-5.1717	-8.8572	-5.1838	-5.5577	-3.8791	-5.6568	-6.4041	-7.0176	-8.4009	-4.2975	-4.5827	-4.5712	-3.4306	-2.5904	-3.9286
Downstream	45	-0.2635	0.8518	-0.6499	-1.2773	0.4468	1.283	1.7794	-0.3424	-0.8951	-1.8819	1.8024	2.0463	0.9745	-0.2144	0.4574	1.6328	2.485	2.7591	1.7712	0.5086	-0.6086	-0.2558	0.3066	0.2832	0.6596	0.5835	-0.1939	0.4259	0.4607	0.3758	-0.028	0.7685	0.9677	-1.199	-1.3876
Downstream	46	-4.4376	1.4319	2.0074	1.3561	1.2498	0.7153	0.4332	-0.5437	-0.9238	-0.9539	-0.2761	0.4433	1.5149	1.6368	1.1669	-0.3307	-0.8332	-0.068	-0.0389	0.6048	2.2431	2.256	3.1441	3.3919	1.1802	-0.1085	-0.724	0.234	0.7516	-0.4391	-0.6199	-0.9882	0.2231	2.2643	0.7254
Downstream	47	24.4807	-1.9006	-1.4267	-2.2807	-1.8983	-1.659	-0.1591	-0.7306	-0.318	-0.17	-1.6789	-1.8682	-1.0716	-1.134	-2.163	-2.0692	-2.3277	-2.2871	-2.0183	-1.1665	0.0795	0	-1.8788	-2.7195	-0.8702	-0.4643	-0.1998	-0.6489	-0.8951	-1.498	-1.588	-1.6078	-1.6304	-2.2518	-2.2181
Downstream	48	-18.3588	4.0012	1.8396	0.7697	-0.6956	2.5405	2.2127	1.9984	0.5269	-0.2033	1.4162	0.7886	0.1157	-0.5098	-0.5984	-0.4968	-0.3812	1.2079	1.1152	1.4714	0.9453	0.4969	-0.3542	1.0638	1.3888	1.6098	0.6661	0.3035	0.9568	2.3047	1.1313	-1.2192	-0.1078	1.3335	1.1641
Downstream	49	-0.1484	2.4597	1.9595	1.4278	0.1961	0.7437	0.3601	0.4485	0.5093	2.2219	2.5185	0.8388	1.8296	1.7222	1.116	2.4098	1.0393	0.4752	1.4313	3.4029	1.1633	1.0585	1.2158	0.7973	1.0275	3.9628	3.4992	4.4178	1.9319	1.3679	-0.3295	1.2178	4.7571	3.6294	3.2679
Downstream	50	-0.5923	18.8001	18.5497	18.065	27.9603	11.9196	13.4414	16.3813	16.6737	17.6611	12.3909	16.8027	11.2202	11.0433	11.9473	8.6755	10.5491	8.8987	8.3408	6.4677	6.4308	8.9393	7.6186	6.5728	4.1897	6.4519	4.5245	4.5213	3.3714	4.0128	4.7515	6.0527	4.58	2.7688	2.6499
Downstream	51	-7.6041	-0.7714	2.249	2	0.4666	-1.0554	-0.7666	-0.5999	-0.6906	-0.7283	-0.072	0.1783	0.255	-0.3902	-1.0162	-1.5739	-0.3424	0.2658	0.8819	0.2053	0.2096	-1.1689	0.6872	1.6645	0.4847	0.4337	-0.7625	-0.8965	-1.0713	-0.4508	-0.4123	-2.1969	0.147	0.5219	0.593
Downstream	52	1.2938	4.8451	6.6025	8.3929	3.8055	4.4109	3.4072	4.6589	4.7075	3.5931	3.2948	4.834	3.3863	4.3311	3.8665	5.5135	5.6012	7.6986	5.3192	4.935	5.2774	6.0411	4.6496	4.8826	5.1677	5.0015	6.9087	6.7169	6.3338	3.2052	4.6166	4.0077	4.4621	4.8811	4.9526
Downstream	53	0.8389	5.666	6.9741	2.9808	3.4768	7.0509	6.315	6.9562	6.2924	3.9907	6.2818	2.9855	2.6543	3.7313	5.6598	2.3601	4.5478	3.7593	4.9959	4.9073	6.8542	4.4612	4.2939	4.7055	6.6624	5.7663	3.7893	5.4563	3.7993	2.2317	1.8535	2.5831	5.3312	5.4595	4.2722
Downstream	54	-2.4125	-0.3461	0.6258	2.4433	3.4526	1.6172	-0.5152	0.8027	0.7816	0.4525	2.7007	2.07	0.7966	1.3119	0.4951	-0.5817	-1.394	0.1224	-0.4839	-2.0103	-2.0412	-2.3602	-0.7613	-1.2827	-1.9503	-1.2873	-0.2715	-0.42	-0.4511	-0.4742	-1.9643	-1.9843	-1.7183	-1.5921	-2.0492
Downstream	55	49.3899	-5.5042	-6.8481	-9.1461	-4.0263	-4.9946	-4.3316	-5.3613	-6.5834	-5.9928	-6.5281	-5.7624	-4.6969	-4.0992	-6.0565	-3.3918	-3.4026	-4.4993	-3.8701	-3.572	-3.2835	-5.9886	-4.7646	-4.852	-4.9616	-2.9115	-4.1536	-5.266	-4.765	-4.1519	-3.6396	-4.2683	-3.4122	-3.2581	-3.0333
Downstream	56	-4.3171	1.3855	0.7594	-0.5594	0.9634	2.6439	3.6374	1.8044	1.4758	0.8896	2.7628	2.1372	1.3731	0.6497	1.9123	2.035	1.0401	0.6408	0.3245	3.2487	2.6813	1.7098	1.9093	2.9123	1.5802	-0.1616	-0.3936	0.2878	1.5609	1.3737	0.9365	-0.9245	0.6127	0.2899	-0.508
Downstream	57	-8.3966	-2.0993	-1.566	-1.858	-1.1654	-1.782	-0.7283	-1.0086	0.5858	0.4491	0.6054	0.815	1.5906	0.5277	1.3362	0.9565	0.1594	1.376	1.0199	1.2298	-0.2848	-0.8332	0.6657	1.3	2.7769	0.5513	0.4558	-0.1843	-1.0276	-1.0083	1.3231	0.5512	-0.6927	-1.5256	-1.7093
Downstream	58	-6.5857	-1.6597	-3.1282	-3.4401	-2.1611	0.3391	-0.5457	-2.4176	-2.8535	-2.2342	-1.5093	-1.2774	-1.3802	-1.4403	-2.1009	-1.835	-2.2678	-2.2241	-2.2666	-1.437	0.2453	-0.4304	-0.0548	-0.7773	-0.1728	-0.9867	-0.6237	-0.248	-0.8824	-1.8833	-0.6134	-1.8379	-1.8822	-0.939	-0.9435
Downstream	59	4.5266	3.1833	2.924	5.7398	6.5774	6.5013	5.8209	7.6	6.5593	3.6096	3.6708	4.1469	5.4796	7.9238	7.6693	6.4893	8.1746	4.8022	6.1644	7.3791	10.4552	5.6108	3.3879	2.5926	2.7443	2.9135	7.6907	12.1566	14.5675	5.4212	5.14	5.161	4.0356	5.5571	4.4557
Downstream	60	6.8149	3.9731	3.4244	2.8807	4.3621	6.4794	5.4002	5.4401	7.8397	6.3943	7.9169	5.39	4.8671	4.4001	3.5939	3.9734	5.5226	6.4364	4.6422	4.6175	3.107	5.4306	4.9915	4.3758	5.2634	3.4031	3.2215	3.262	2.4308	3.0529	4.3508	4.8473	2.725	2.184	1.671
Downstream	61	5.8514	-0.8068	-2.2349	-1.487	0.7345	-0.6439	0.2117	0.864	2.4404	1.3865	1.2353	0.0237	0.2855	-1.62	-0.9556	-0.3449	0.7935	1.5838	2.5023	0.5356	0.4266	0.2913	-0.2175	0.4838	1.1045	1.5081	1.0211	1.5497	0.3786	0.0537	0.6941	1.0589	0.8816	0.6901	-1.3196
Downstream	62	26.2764	-10.2126	-8.6783	-13.2746	-6.7222	-6.8658	-6.9282	-10.2629	-8.24	-6.8913	-8.7729	-6.6383	-9.4982	-6.7574	-7.6286	-5.1923	-6.7026	-6.8481	-9.6084	-6.871	-5.765	-7.8845	-6.8424	-8.9274	-8.6032	-10.5568	-6.2269	-7.8562	-5.3863	-5.1259	-6.9886	-5.5667	-5.9243	-6.2763	-4.7921
Downstream	63	3.9329	15.6798	16.6198	22.9418	29.9889	21.9307	22.098	15.9465	21.6414	34.1608	36.6849	26.3148	26.9943	27.2261	26.1409	21.6485	28.2568	29.0453	29.6289	20.0823	21.8227	24.6067	16.7879	15.3926	22.7613	20.1751	23.6047	15.9627	20.1183	28.6302	25.4307	17.1916	19.23	19.2476	23.3018
Downstream	64	463.985	-3.3529	-3.3051	-4.3495	-6.5147	-7.4819	-5.7701	-4.5531	-4.0623	-5.4305	-5.1463	-6.1029	-3.3808	-5.9715	-4.1136	-5.1446	-3.5267	-4.3721	-3.1478	-3.0294	-6.1041	-3.7852	-6.4794	-4.116	-2.8173	-2.7371	-3.0307	-3.9139	-5.0984	-4.0727	-3.4837	-2.3007	-3.2436	-3.6315	-4.0297
Downstream	65	29.1089	17.6414	20.7556	21.3453	17.3227	13.0329	14.8056	24.6836	18.7443	13.9483	14.5727	22.7852	15.3489	17.3327	19.2808	14.0479	15.7907	16.0699	20.015	13.4064	17.6494	15.529	15.1255	16.2547	17.5115	17.5192	12.1514	13.0381	15.6009	12.2754	23.5342	15.1746	17.7975	15.2904	19.762
Downstream	66	6.5276	15.1635	13.4823	16.4965	9.7877	9.9226	14.2703	12.3455	12.8143	7.4326	9.6906	13.835	14.1834	18.4541	18.1496	10.7528	14.5607	11.5561	12.4278	8.3658	11.0196	16.1226	9.4969	9.3357	11.5832	13.7863	8.2555	10.504	9.6895	10.6513	10.9416	14.6709	10.9097	12.8779	11.3784
Downstream	67	27.3704	-2.0033	-1.1885	-1.6745	-1.2869	-0.1486	-0.1734	-1.1929	-1.3894	-1.893	-1.2129	-1.109	-2.0489	-0.7273	-2.198	-2.0435	-2.0159	-3.3348	-1.8039	-1.07	-0.4102	-2.5464	-1.1943	-0.3872	-0.03	-1.6185	-2.5515	-2.3331	-1.4402	0.2207	0.4499	-0.123	-0.9346	-1.8159	-1.4562
Downstream	68	0.4624	13.4975	13.4693	14.2122	17.0119	12.9563	13.6933	14.7055	16.1328	13.0017	13.7348	16.4729	17.0813	15.206	15.7748	18.8295	18.3484	13.0985	12.8209	15.7311	16.6212	25.8956	13.467	12.4047	10.5583	16.1057	14.8706	17.4749	18.2318	16.5889	15.3769	15.7514	12.4995	17.2738	15.4865
Downstream	69	-1.2964	11.2797	6.6626	6.4906	7.075	8.248	8.674	11.7821	9.8248	12.2355	11.0364	7.7252	7.7809	6.6416	7.0963	4.9707	8.1432	9.1214	6.4355	6.0455	7.1158	12.9998	6.1721	4.4513	7.2737	4.6554	6.5575	7.2165	7.3519	4.9642	5.7881	10.4692	7.9254	7.1382	10.4054
Downstream	70	-11.2091	-0.2309	0.8983	1.0459	1.3428	1.0963	1.4108	2.293	1.1232	-0.4763	1.3881	2.8155	4.1774	2.6736	1.2605	1.5511	0.4261	0.0304	0.8144	1.8782	2.4106	1.8763	3.0651	1.5789	1.9245	1.0236	1.6186	1.7668	2.3785	1.9358	0.0938	2.1354	3.2941	6.8892	4.4791
Downstream	71	-1.5689	1.5696	0.5575	1.5402	2.3752	3.3699	3.4675	5.2582	4.7595	2.0597	0.9871	2.5796	1.5745	2.1616	2.0152	3.309	1.8974	0.7795	1.2602	1.2032	-0.06	1.3561	2.3896	2.1511	1.5848	1.8082	2.4247	2.8963	4.54	2.1592	3.5854	3.4521	3.133	1.7055	0.0699
Downstream	72	-7.4027	7.1613	7.3504	5.8465	10.8657	11.682	7.6589	7.8073	3.6582	6.7718	7.4988	6.0831	8.7314	9.3845	4.4457	7.6534	9.7131	5.8563	5.0211	5.6083	6.0737	7.651	4.2693	2.3192	3.1875	5.0324	4.4994	2.8269	3.8218	6.7472	4.2008	7.074	10.0437	6.9167	4.861
Downstream	73	1105.68	1.7682	1.8793	0.469	-0.2219	1.5022	2.3754	1.6926	1.793	3.759	2.9201	2.1215	5.2633	2.7403	1.7651	1.6825	1.5276	2.5449	3.7385	2.1701	0.9793	2.1774	2.2016	2.1703	2.1731	1.7811	1.9214	0.7479	1.3441	2.8631	2.7122	1.9597	1.5537	0.7531	1.7875
Downstream	74	2.9865	11.8777	16.2342	7.0802	10.2886	9.5879	9.2991	11.5196	6.5563	9.4937	11.1635	15.3597	12.7398	11.333	11.1581	8.8643	10.561	10.1865	7.7389	9.9091	9.9727	10.4101	11.4141	8.7016	10.4018	10.89	10.2058	7.2927	7.4478	6.2542	7.3499	7.1265	8.1249	14.6818	8.3355
Downstream	75	911.882	-0.3714	-2.7098	-3.1735	-3.4869	-3.6993	-3.8633	-3.3987	-6.1623	-3.2955	-1.7653	-1.9762	-3.0718	-3.4093	-3.5218	-3.4123	-4.2052	-3.6454	-2.4169	-1.7564	-1.6682	-3.6793	-3.3264	-4.2427	-2.6377	-4.9305	-3.4958	-4.6481	-3.9529	-1.8875	-2.3837	-0.9587	-2.616	-2.779	-2.527
Downstream	76	-10.2935	2.6132	2.5584	2.4332	3.0996	5.0493	3.9203	4.5548	2.5919	1.9329	3.2791	4.1065	3.4392	4.2535	2.902	4.1054	2.0796	3.04	3.0576	2.8761	4.7905	2.151	2.0066	2.1973	3.039	2.7091	2.5188	3.7889	3.0192	1.577	2.4531	2.8162	2.3197	1.7583	2.1894
Downstream	77	4.8922	10.5034	11.2813	16.2385	18.9394	13.5562	14.7068	15.8368	14.4755	13.9837	15.8835	14.6104	10.584	10.4116	12.5565	8.6907	21.3616	12.9733	9.2843	12.4492	8.2547	10.272	8.0855	8.2768	8.9587	9.7928	9.2742	8.8847	5.5246	9.9222	15.5286	11.3015	11.424	11.7875	7.0769
Downstream	78	95.8213	9.5089	6.0071	14.4178	10.8346	12.7886	9.8444	8.6496	8.6167	10.2155	11.4286	7.0046	6.8673	7.3658	10.7808	7.9952	7.5439	8.2825	10.6118	8.702	5.4982	6.8173	8.0727	9.7653	7.7538	4.7587	3.5821	7.034	9.9965	7.0953	7.7216	4.5937	5.6288	4.6826	5.6886
Downstream	79	-4.4458	9.054	11.1068	8.8083	6.7052	7.3122	8.2028	9.662	8.8165	8.0051	7.8767	6.0026	8.0329	4.7334	6.2555	5.1725	5.4024	7.1178	6.0393	8.1767	6.7334	6.4055	7.1209	8.5251	9.2488	11.6857	10.0141	7.2051	9.8231	4.6671	6.784	8.606	11.3572	7.7498	7.276
Downstream	80	0.5768	0.3269	-1.2537	-2.7534	-0.95	-0.7493	-1.8674	-3.229	-1.7614	-0.6639	-1.9555	0.2863	0.129	0.7601	0.0489	-0.1854	-0.253	-0.0096	-0.9746	-0.0947	-0.6331	-0.5095	-1.9387	0.6397	0.9989	-0.0758	0	0.0762	-0.6763	-1.0523	-1.2532	-1.7829	-0.8978	-0.0643	-0.1762
Downstream	81	-10.8672	-6.1604	-5.323	-4.0055	-5.3786	-5.856	-7.6606	-4.6188	-3.7974	-4.2943	-2.9744	-5.2681	-4.6208	-4.3439	-3.7146	-2.5147	-2.1336	-2.8258	-3.0053	-3.7401	-4.0944	-4.6147	-2.4672	-2.5075	-3.5233	-2.9468	-3.1062	-2.4922	-3.1576	-1.6671	-2.7053	-2.3949	-1.8734	-1.7493	-4.6329
Downstream	82	0.8368	6.1616	5.2099	3.7993	5.867	6.5805	4.6565	6.3454	5.1834	8.2019	5.4912	6.0458	5.1975	4.8573	5.7747	10.0753	7.9347	5.5753	5.7625	6.1977	5.1983	5.4452	7.7969	7.9651	9.4848	3.2015	5.0152	1.911	4.2014	4.5604	2.4498	2.6281	4.6748	3.7528	4.2485
Downstream	83	2.7357	7.1251	9.9293	7.168	5.6084	5.4609	7.2519	3.9939	5.0544	4.764	4.4039	4.2281	7.6772	8.3358	4.9084	4.6466	5.2053	6.3188	4.0708	4.6397	8.3057	7.7929	5.6256	4.1424	3.4347	3.2858	2.6975	4.1222	7.8554	6.9693	8.6645	8.5775	5.9056	7.7849	3.8425
Downstream	84	-4.2332	4.1123	4.7897	5.4151	5.8447	7.1508	8.5517	5.8774	5.7981	5.9456	7.1335	6.4989	5.1211	7.2842	4.8291	4.3404	5.396	4.8024	3.5082	5.8666	6.708	8.2539	8.8409	6.5638	5.3182	3.281	3.3925	7.8633	5.6184	16.1919	9.1145	7.4612	10.1387	10.0522	6.8513
Downstream	85	32.3765	3.0457	0.9795	1.3487	1.4546	0.3164	1.3423	1.4732	4.3934	5.4885	2.8469	1.8395	2.9987	3.8843	3.3009	2.2106	1.5442	2.3318	1.6513	0.7012	2.3284	1.5419	1.9045	3.766	2.2904	2.0633	0.142	-0.0432	0.2721	2.4353	3.2115	3.0117	2.2035	2.124	5.8847
Downstream	86	60.3083	-0.2894	1.0182	0.3174	-0.4389	0.7439	0.2053	-0.5246	-0.2637	-0.6725	0.4899	0.8234	0.0208	-0.6516	-1.2509	0	-0.2196	-0.6944	-0.2975	1.7062	1.1522	-0.7944	1.3955	3.1172	2.6998	0.6375	-0.4728	-0.0451	-0.0959	0.0273	-0.1216	-0.1148	-0.3168	-0.386	-0.6458
Downstream	87	12.1514	5.5001	8.0223	9.2667	8.2684	7.9443	6.5799	6.8654	3.3	4.6073	5.1649	5.3595	3.9966	1.5881	3.0127	5.406	5.4332	5.0461	3.2805	3.8125	5.9321	3.8313	3.6168	2.369	1.8833	2.1458	3.3935	1.8741	2.6587	3.235	5.8814	4.7119	3.8152	3.0604	4.7209
Downstream	88	-3.891	6.8524	7.4484	7.0356	8.2947	8.5462	6.3545	4.3807	8.0294	6.1202	5.2191	6.3851	1.6922	2.1918	4.6065	9.1394	6.6299	5.3052	3.5546	3.5793	4.7025	5.6903	5.3988	5.5771	3.8366	3.5074	2.7867	0.6118	2.1209	4.3202	4.4605	5.6109	6.3734	3.7615	1.9695
Downstream	89	-1.9846	15.1107	15.854	18.9077	14.5617	13.2613	10.8967	11.015	17.6333	15.0099	9.2925	6.866	5.3836	6.3226	7.1449	4.7476	9.0359	10.0362	7.5116	5.2791	6.0956	5.5603	5.0499	3.6513	5.489	5.6264	6.0554	5.7807	4.7197	5.6202	5.6237	5.294	3.57	3.6473	2.6989
Downstream	90	2.4919	8.2792	7.3898	14.0827	14.6473	10.6211	10.2892	11.4979	7.7088	11.9747	8.9787	8.5824	13.0191	9.599	9.8578	7.8202	12.1119	12.2353	9.4111	7.496	9.0268	9.9968	11.7309	7.8223	8.9051	10.4486	9.2909	7.2326	9.7382	7.0675	9.0895	6.1748	7.8416	10.4668	10.0288
Downstream	91	-11.8024	1.8205	3.8064	7.5336	3.9793	4.3121	2.8611	4.2612	1.8214	3.0373	1.9397	1.2961	2.0602	3.053	1.7217	1.7022	3.9648	4.1425	5.6297	4.8212	4.7502	3.6977	2.7223	3.858	3.4366	2.6291	2.531	2.6719	1.912	2.205	3.4706	4.541	2.3264	2.6811	1.4018
Downstream	92	-8.2806	-5.1906	-5.047	-1.6835	-1.3277	-5.9428	-4.2511	-3.5005	-2.631	-2.9402	-3.2809	-1.8996	-3.1728	-3.2761	-3.2203	-2.8445	-4.2839	-4.6768	-3.0761	-3.6339	-1.9703	-3.1193	-3.5894	-3.5737	-3.3298	-2.0415	-2.1498	-2.2931	-2.5548	-2.2087	-1.9001	-1.9822	-1.7034	-2.4069	-2.4375
Downstream	93	-10.0598	-5.1147	-5.9784	-3.8877	-4.2518	-2.2395	-1.7103	0.4416	0.2749	-0.1009	0.9702	0.2217	-0.3386	-1.2179	-0.9376	-0.8023	0.1318	-0.2265	0.7541	-0.4829	-0.8199	0.259	0.0315	0.1887	0.8378	0.6574	0.235	-0.9294	-0.48	-0.781	1.1771	0.6158	-0.0929	-0.9104	-1.4303
Downstream	94	0.588	4.4735	7.5464	7.7574	5.4786	4.4842	7.1504	3.8416	4.5306	4.4905	5.9619	4.4412	3.714	5.952	6.6284	4.7076	3.8978	2.8882	0.8783	3.8182	4.6589	4.4396	4.76	3.9289	5.7865	7.0843	3.5306	3.3973	2.6313	3.2193	1.6054	1.4954	5.2414	3.4643	6.2177
Downstream	95	96.7833	3.5756	1.9648	3.308	0.8041	2.3826	1.5346	1.6031	0.912	1.2583	2.7594	2.2969	2.2652	1.1841	0.982	1.1505	0.3312	1.9841	2.6293	2.4234	2.5286	2.5212	0.6389	0.426	0.6126	0.5035	1.5922	1.1871	2.0123	2.497	1.1127	0.1867	2.4563	2.9288	4.0136
Downstream	96	125.437	-6.4381	-5.9478	-6.3743	-7.3305	-7.0375	-6.0955	-6.4309	-8.7544	-6.5215	-8.5816	-6.6795	-7.6032	-5.9056	-8.0499	-6.1265	-5.6015	-5.5499	-7.233	-5.2522	-5.8223	-7.2719	-5.5551	-5.065	-5.7185	-5.2726	-4.742	-5.7622	-4.4664	-5.7715	-5.7384	-5.8218	-5.4572	-6.3721	-4.96
Downstream	97	-8.8329	0.1982	0.6152	2.1994	0.6665	1.4425	-0.4391	-0.2897	1.019	3.1432	1.7162	1.2354	1.5736	1.7887	2.601	2.379	2.0091	1.8407	2.7059	2.9903	4.117	3.6903	3.5077	2.5358	1.2149	0.3857	0.1031	1.9358	1.7641	2.9803	0.6172	0.8627	2.7501	2.4102	1.9907
Downstream	98	75.3214	-5.0812	-5.5131	-7.2574	-4.6291	-4.9027	-3.5506	-6.498	-4.5752	-3.9456	-5.1855	-3.9067	-3.5765	-4.8986	-5.7215	-4.0643	-4.7995	-6.4664	-4.1155	-5.3347	-2.846	-4.1209	-3.9128	-3.3829	-4.259	-2.6784	-4.9549	-4.6412	-4.2101	-2.9021	-3.282	-2.7306	-4.9984	-3.6511	-5.4166
Downstream	99	10.0706	20.5449	16.8327	21.418	24.0297	21.6022	16.253	21.994	18.6347	17.816	18.3076	16.7279	13.8266	20.4569	22.0795	14.5408	21.8001	17.0171	18.9267	16.1105	21.1373	12.7866	13.9775	11.9207	12.5267	15.3826	18.5395	19.3935	16.5184	16.0612	12.6265	17.2789	13.4185	12.5463	12.5522
Downstream	100	37.9115	10.8652	11.4095	8.8163	8.865	11.4089	7.1863	9.6581	8.754	8.7992	8.2002	10.5898	9.1986	10.3459	11.8949	9.6954	10.2677	9.1438	10.0487	11.0686	12.3821	11.3297	9.5261	10.7262	7.0908	7.2514	7.0908	8.7509	9.1098	12.8787	5.9006	8.4495	8.8201	10.3781	7.7297
Downstream	101	-4.8702	-3.4841	-3.2308	-3.8557	-3.4733	-3.584	-4.6298	-2.8465	-1.8718	-2.2578	-1.8992	-3.4102	-2.3512	-3.2751	-1.6053	-1.8836	-3.0341	-4.5405	-2.6706	-1.2706	-0.6274	-0.8144	-0.2954	-0.285	-0.9164	-1.3293	-2.0512	-1.1796	-0.6801	-2.3177	-2.8681	-1.8408	-0.7936	-0.8858	-0.5103
Downstream	102	43.9785	3.7026	4.2694	5.2376	3.5014	2.1275	3.9091	5.7421	7.5014	3.425	5.907	4.8619	4.2514	4.242	4.3816	3.8875	0.7811	1.4187	2.9238	5.9096	4.9263	5.6162	4.2446	5.0739	3.8579	3.2697	1.6158	1.2007	2.4227	4.4993	3.1739	3.17	3.394	5.7665	2.5742
Downstream	103	-4.6463	1.1345	2.7909	1.7037	0.7908	2.1837	1.2923	2.1441	2.0823	1.9921	2.9709	1.3458	1.0805	1.1737	3.6517	2.3785	0.6473	0.9777	4.4769	1.736	0.9173	0.4246	0.5795	1.8863	2.1865	1.3306	-0.0424	-0.1664	-0.2071	-0.4549	-0.4567	-0.5787	-1.5028	1.6054	2.7009
Downstream	104	42.032	2.1061	3.3371	5.6992	5.182	5.6428	5.7632	8.0801	3.7861	4.2602	4.2098	7.8658	7.2154	5.2259	4.7213	7.3673	3.3509	5.0379	7.5872	4.9784	4.1117	3.1842	2.1756	4.0775	3.3142	3.039	4.1099	4.4808	5.0847	4.7621	3.5423	3.8638	4.5736	2.8344	2.8967
Downstream	105	-4.047	4.2342	3.6447	3.0751	4.9403	8.6236	4.371	3.9908	4.5374	7.3412	4.1001	3.8773	7.012	5.7351	2.9447	2.761	5.0517	3.929	5.552	4.9751	3.809	2.8046	4.0314	2.6338	1.3678	3.6565	2.9897	4.0013	4.7118	5.9511	3.6963	5.3136	5.0175	4.4204	4.1627
Downstream	106	0.9377	2.9833	7.8393	7.7876	4.0367	3.7561	2.6298	3.3384	4.2096	5.786	7.5111	6.0449	6.4244	4.6207	5.1932	5.5785	5.9559	6.7395	2.3581	3.3171	4.3676	5.362	5.5319	7.2229	7.0289	4.4599	4.0689	3.9101	4.3614	5.4976	6.339	6.3692	5.8703	4.414	3.3882
Downstream	107	-2.3402	0.0877	-0.361	-0.5565	-0.7689	-0.3392	-0.9789	-0.0135	1.729	1.4945	1.9531	2.4358	2.1169	0.9597	2.0045	1.1613	0.3086	-1.1105	-0.3016	-0.0203	0.5502	1.0353	1.1782	0	1.8928	0.1026	0.8014	2.023	2.0704	2.0384	1.1166	1.6171	1.2695	2.4896	2.7029
Downstream	108	24.4114	6.0555	4.1173	6.9469	3.6622	5.9578	7.179	5.4224	6.3621	3.7006	3.5663	6.063	5.4389	5.7771	4.6038	4.851	5.0609	3.3039	4.3404	5.3914	3.7376	3.1853	2.0626	4.7658	4.6031	2.675	5.128	4.9108	4.6263	3.4942	4.8615	4.1595	3.1221	4.1587	3.4553
Downstream	109	192.007	2.3474	1.1089	0.7521	-0.6152	-0.1447	-0.3373	-1.4765	-3.3243	-3.2674	-1.7294	-1.3999	-0.6822	0.049	-0.4386	-0.0563	0.3193	-0.959	-0.6065	-0.8091	-0.0985	1.0238	1.0889	-0.6342	-1.3826	-1.5545	-0.1422	0.1942	0.4444	0.375	-0.7323	-1.8819	-2.7545	-1.9912	-1.9341
Downstream	110	7.5417	3.7975	3.4625	2.6961	3.3539	1.8755	0.9516	1.3942	2.5034	4.7859	3.1557	2.5355	0.9585	1.2416	3.5168	3.2843	4.3649	8.591	7.0348	1.732	2.0424	3.2575	3.353	4.3444	4.882	2.5868	1.3319	0.8064	0.9028	0.334	2.6698	4.5684	5.751	4.9894	5.2878
Downstream	111	-9.5301	2.2539	4.268	3.6657	2.5525	2.8836	2.3537	3.2843	2.4909	1.9458	2.3095	3.3418	4.242	4.3247	2.9026	1.354	5.0558	4.0505	2.9582	2.0122	3.9405	4.2042	6.5448	3.8311	2.9466	4.4457	4.5071	1.2895	2.5496	4.1577	2.6325	2.4657	3.1838	3.8585	4.7557
Downstream	112	-4.9428	2.7409	2.1747	2.0683	3.1315	4.8487	1.2376	2.5942	4.76	6.4072	4.9405	8.2324	5.0991	3.0632	1.8701	3.8939	4.2325	4.7374	4.7064	0.8929	1.4913	3.195	5.0512	5.5784	3.5964	3.3269	2.6506	1.6338	1.2322	1.0691	2.2433	3.0953	2.9468	1.4182	2.2603
Downstream	113	-4.9028	0.7265	3.9733	2.7363	3.26	2.4438	2.5142	2.6456	1.0204	1.8063	2.5448	4.2944	3.17	3.9019	5.1377	3.529	1.6073	2.0234	3.8586	2.9282	2.7882	4.3176	3.4629	3.6371	4.2062	1.562	2.062	5.5599	2.7655	2.1135	2.7855	1.798	2.6318	1.1822	4.3874
Downstream	114	-13.086	1.4104	0.8947	-0.7728	-0.8935	-0.5041	-1.2101	-0.7532	-0.3462	0.4662	0.8519	-0.6849	-1.1407	-0.6115	0.1438	-0.037	-0.5382	0.4833	-1.2124	-0.7477	-1.5598	-1.264	0.1166	1.5136	0.6816	-1.2769	-2.1863	-0.8777	0.4396	0.1969	1.1505	1.7119	1.4913	-0.1344	0.3472
Downstream	115	5.9347	16.4204	12.2566	7.7599	6.9898	10.4555	5.8586	7.9873	7.1929	7.9524	8.1469	6.8372	5.2125	5.1909	3.1775	5.6136	4.4168	5.4831	5.5494	6.6698	4.8978	5.6329	6.2664	3.4401	4.988	6.1241	3.9362	5.8682	6.4763	3.1655	4.7283	4.7801	7.4901	5.7647	6.3311
Downstream	116	18.8869	-2.0713	-1.8065	-3.6823	-3.0901	-3.2216	-2.3614	-1.3071	0.8515	-0.0246	-0.1286	-0.2997	-0.6206	-0.1844	-0.2373	0.1364	1.2849	0.7958	-1.3111	0.725	-0.4293	-2.1317	-1.5508	-1.3652	-3.1953	-1.9518	-1.1976	-0.8074	-2.2933	-2.6972	-1.781	-1.7948	-2.1385	-2.234	-1.4995
Downstream	117	-6.7911	1.0233	2.4035	3.7442	3.1732	1.4519	2.1992	4.0246	2.8263	1.9781	2.4744	3.8383	1.3656	1.8379	2.6001	2.9212	1.2166	2.6693	2.4905	3.4297	5.3413	3.4142	3.7311	4.2262	4.0779	4.5965	2.2875	2.8866	3.6768	5.6258	7.1314	3.4456	4.0897	1.3137	1.3771
Downstream	118	-5.621	-3.2017	-2.6784	-2.2326	-0.636	-0.5289	-1.7929	-2.6694	-1.1806	-0.7582	-0.5417	-1.8868	-1.032	-0.894	-2.165	-2.7851	-1.5297	-0.9065	-0.3776	-0.8281	-1.7088	-1.3578	-1.5689	-1.3887	-1.9876	-0.5522	0.0514	-0.3562	-0.7708	-0.5143	-3.2349	-3.2031	-3.7814	-2.403	-0.9111
Downstream	119	33.4617	-6.4819	-8.7147	-6.6825	-7.0313	-6.9635	-10.0526	-6.9707	-9.4653	-6.9496	-7.3272	-7.2077	-7.1149	-7.8542	-6.7615	-10.5821	-6.5616	-7.0346	-6.8659	-7.6884	-7.0851	-7.8912	-6.155	-7.0807	-7.2423	-6.7949	-7.5044	-9.1173	-7.866	-7.7672	-6.8937	-4.7288	-7.3757	-6.7107	-6.4726
Downstream	120	0.8307	5.2885	6.3473	5.3609	7.3205	3.8531	4.6755	5.5148	6.636	4.9904	5.2535	6.4669	6.3956	6.3426	4.5054	7.8099	6.4088	7.0714	3.6374	1.8395	7.3236	5.2216	4.7686	2.9756	3.8675	4.5616	6.3123	5.876	6.098	9.6572	6.4798	4.0056	6.0158	5.5105	4.8618
Downstream	121	128.512	-1.9265	-2.932	-3.2179	-3.4218	-3.605	-4.5145	-3.4035	-2.8461	-4.0216	-3.0357	-2.8114	-2.839	-1.9366	-3.8271	-6.085	-5.68	-4.5732	-3.0559	-1.9726	-2.527	-1.6103	-1.8033	-2.2429	-0.875	-2.2753	-2.5072	-3.5416	-2.9149	-2.0041	-2.7948	-2.8709	-3.2229	-3.5835	-1.478
Downstream	122	0.9401	6.1466	8.345	5.8288	6.5328	12.3518	7.3071	6.2642	9.2146	7.5343	7.199	4.5211	5.5161	3.1513	2.9965	5.0187	4.5435	5.4628	3.1348	5.5926	3.9674	3.7308	7.3237	3.5777	3.0527	4.2	4.1096	4.9055	4.311	4.3674	1.9652	2.5748	4.8641	4.6062	4.2025
Downstream	123	-9.0596	-1.2574	-0.5518	0.4951	-0.6764	-0.6206	-1.6959	-1.5658	0.6029	0.7508	-0.2899	-1.2993	-0.9554	-0.9168	-2.6893	-2.8287	-0.8546	-2.1513	-2.1513	-2.2524	-1.7843	-1.936	-1.8323	-1.6797	-0.1163	0.7768	-0.8113	-0.8382	-0.9062	0.9164	0.8411	0.0661	-0.7366	-1.1997	-1.6487
Downstream	124	6.1444	6.7139	5.5699	4.3254	2.5308	4.0723	6.1294	3.4717	2.0952	1.846	5.363	5.1606	5.2904	7.3866	4.0297	3.4044	7.511	4.8379	2.9221	6.0877	5.3827	6.2863	7.2605	4.7697	4.9928	3.6477	5.6318	4.1159	3.7729	3.9105	2.367	3.7795	5.9417	3.8105	4.6483
Downstream	125	-17.9675	-0.3587	-0.3291	-1.5292	-0.6836	0.5485	-0.3679	-0.5062	-0.4895	0.7622	1.5777	1.8304	3.3061	0.7152	0.1156	0.9762	2.9558	3.4771	3.5947	1.0164	0.6882	0.1937	-0.5464	-1.4218	-0.5452	0.2183	0.0078	-0.4345	-1.4616	-0.0822	1.4646	1.0102	0.5834	-0.3423	-0.5349
Downstream	126	-2.3775	6.5913	8.8119	4.8309	5.068	4.657	3.1628	3.9874	5.0551	9.6583	9.1239	8.8804	8.2083	4.0935	4.3466	7.2222	9.196	9.5462	9.1034	6.3966	5.9417	9.3734	8.054	6.7109	9.5347	7.6895	8.1396	5.4517	5.548	12.2713	12.8504	5.6574	6.7497	10.9765	9.6061
Downstream	127	-0.4681	2.4321	2.7231	3.9384	2.5847	5.2473	5.0869	3.2847	1.0388	1.1784	3.9953	4.5713	3.4618	3.7136	3.6743	4.7007	4.1733	2.5675	4.6614	3.0421	3.7559	3.0821	1.8122	1.6493	0.6526	2.2557	3.3166	3.3428	5.0566	1.4065	-0.349	1.2559	-0.5252	1.6455	2.4367
Downstream	128	14.6531	9.6437	8.0883	8.117	6.6193	5.4012	5.2545	5.5592	4.7579	7.0637	6.2143	7.1971	6.6016	3.6272	3.9307	2.7978	3.5324	2.824	3.1343	5.2142	5.6133	9.8684	4.4123	5.4768	8.1159	5.145	7.7758	3.9579	5.7031	6.2796	5.1538	3.4506	4.3547	5.8188	8.1813
Downstream	129	-0.0539	8.1447	6.049	10.2341	12.1944	10.2877	13.3694	10.2035	5.1004	5.4992	5.944	7.2873	6.354	4.2257	11.2798	5.2736	5.4009	7.2548	8.3386	8.2116	5.7685	5.6898	6.4249	5.7701	4.4927	3.5491	6.5652	7.7936	5.5047	5.4594	6.6608	4.0871	3.9412	11.7321	13.2323
Downstream	130	2.3304	20.479	19.9701	27.6207	24.0756	28.212	20.6083	22.5498	23.18	19.0915	22.8165	14.1048	13.58	18.0371	19.8311	25.1089	16.9115	22.4583	20.091	16.3299	16.2867	20.2288	21.3912	19.0566	20.9952	15.1141	14.2699	14.3642	24.6045	16.4362	14.4016	9.1655	26.2185	21.9725	21.8468
Downstream	131	9.1991	5.8257	5.4724	4.7981	8.3009	7.24	7.6984	9.0394	9.0877	8.9889	6.2207	6.8905	5.226	6.1209	5.4904	5.7261	5.6497	8.412	9.8886	9.5944	7.7673	8.143	6.077	5.8735	5.8683	5.647	4.7415	2.5995	5.7009	6.3101	4.7902	4.8057	4.1517	2.4416	4.6135
Downstream	132	1.6688	0.9335	-0.3541	-1.1058	-0.0134	0.9903	0.0552	-0.8354	-1.0311	0.2804	0.4864	-0.6694	1.0346	1.485	1.6895	0.8022	-0.913	-0.8927	-0.8944	-0.8398	-0.8182	-0.6619	2.0604	1.0665	1.7464	1.8387	1.9258	0.9598	0.5005	-0.4559	-1.5785	-0.3513	2.351	2.4202	1.1162
Downstream	133	0.0973	2.6478	3.6824	4.6944	2.0969	3.5823	2.5586	3.9619	5.5534	9.9668	5.0139	4.5522	0.7797	2.6943	2.4775	3.9121	7.2095	4.2382	3.5303	4.0651	2.7198	1.7213	2.4783	5.2048	3.293	1.2319	4.5416	3.4892	6.2273	2.7343	5.6642	6.6584	3.914	5.8919	4.6409
Downstream	134	-7.6203	7.5444	6.5821	7.1263	6.9545	10.1147	6.0556	7.5973	5.5712	7.1833	8.9918	9.5161	9.4721	9.3709	9.8	12.6095	8.6507	6.6845	8.2074	8.3055	8.8474	11.1772	6.5585	6.9689	4.5972	7.5816	4.0065	7.0393	6.2321	8.6165	7.0096	8.4262	6.4152	5.7618	6.4618
Downstream	135	-1.0108	-1.4622	-0.4753	-0.3095	-0.3898	-1.2684	-1.2275	-0.4002	0.7217	1.9163	2.1675	1.5124	-0.9333	1.1335	2.8627	1.6699	0.3442	-0.4886	0.8955	2.5253	5.1551	3.8135	1.4402	1.4954	2.8717	4.0394	2.0663	2.1332	0.1704	0.7265	2.2566	0.9803	1.3832	0.3169	-0.2987
Downstream	136	4.6958	1.9342	2.0217	0.8562	0.849	2.7427	2.8422	1.5425	2.4923	2.9399	3.1261	2.609	2.273	2.4026	2.8946	2.477	1.9016	1.6828	1.5109	2.4622	0.9464	1.7678	2.7896	0.2302	0.9235	2.1513	1.2686	-0.0835	-1.759	-0.222	0.8665	0.9072	0.5863	4.0732	2.3133
Downstream	137	3.5371	5.118	5.4686	4.0954	5.0249	5.5181	5.6858	6.5473	6.65	8.5542	6.3342	3.6024	5.2878	4.7733	6.6073	7.0623	7.3718	5.0356	5.5652	4.8774	6.035	4.9761	5.2167	3.4198	4.2255	2.3003	1.7546	2.8253	4.6178	5.8503	10.047	10.826	6.2427	5.4996	7.1643
Downstream	138	365.219	-1.0544	-0.5755	1.0629	1.9462	3.6681	2.2069	2.1702	2.1801	1.2553	1.3771	1.4798	1.4145	3.8436	2.9684	2.8098	3.1297	3.1894	3.0844	3.6204	2.082	3.4525	3.8534	3.489	0.8076	1.118	1.8136	2.7277	1.9012	3.2699	3.1131	2.5598	3.3201	3.4232	4.4162
Downstream	139	-2.1201	4.401	4.0167	4.3735	3.5416	2.9753	5.9354	6.2775	8.5541	9.3099	5.2591	6.1748	4.8797	6.1938	2.9979	2.6163	4.4907	5.7323	4.6979	2.8479	3.3291	4.4242	6.4715	3.7927	3.7163	1.3633	2.7799	3.9504	6.2184	6.2148	2.3972	1.5274	1.9721	5.8328	2.4469
Downstream	140	-13.2424	-9.7724	-9.0863	-8.8453	-5.3745	-7.7594	-6.3719	-9.1543	-5.9841	-8.7569	-6.5686	-7.7064	-8.6454	-5.5162	-8.4404	-13.4286	-11.3204	-11.6312	-10.3376	-9.5097	-7.0871	-6.5703	-4.366	-5.8333	-5.8216	-7.9228	-7.7512	-7.4941	-8.5659	-7.7809	-6.881	-9.6444	-5.5508	-5.2021	-6.8834
Downstream	141	70.8072	-7.819	-10.1953	-10.0414	-11.493	-10.2605	-12.306	-8.7066	-10.0192	-10.3478	-12.7173	-11.3348	-9.9621	-12.4406	-10.6877	-7.5606	-8.7654	-9.7886	-9.3993	-7.9875	-7.1855	-11.8154	-9.415	-9.5178	-7.7857	-7.9877	-9.8102	-8.3629	-6.0956	-9.3077	-10.1392	-9.9843	-8.7697	-9.6598	-7.7013
Downstream	142	-5.4138	-1.2576	-0.1379	1.6748	2.0744	2.7498	-0.276	0.0982	-0.3887	1.0532	1.7595	3.0355	1.7657	1.6201	1.5978	2.5981	2.8584	0.8688	2.1677	1.7573	0.4727	0.6632	0.6735	0.1226	0.2887	1.0544	1.7983	1.9077	1.2723	1.83	1.0515	2.2914	2.3912	2.0991	2.0175
Downstream	143	2.5706	6.9303	6.8779	8.3702	8.2096	8.7625	4.893	5.1782	5.3842	7.7099	10.4032	9.9284	7.1681	9.5451	7.7464	7.0324	7.1149	10.2647	7.8214	8.2231	6.4235	5.8268	3.0221	6.3233	6.3121	7.8173	7.1668	7.9187	4.4235	4.5945	5.3341	5.2338	3.7211	6.8867	5.7995
Downstream	144	-0.8515	4.8143	3.9243	0.4075	2.4206	1.5551	3.3876	4.4082	3.3894	5.8214	2.4916	3.6517	2.4538	2.5259	1.6786	4.2103	2.3606	4.9494	1.7906	2.8301	2.9227	3.8865	4.2462	3.8864	2.973	2.5491	2.0671	6.1488	3.2877	1.1726	1.5615	2.9101	3.1365	3.7167	1.8836
Downstream	145	69.906	-1.2271	-1.972	-2.1871	-2.0683	-3.2621	-1.8856	-1.0682	0.7679	1.8719	1.3353	0.255	-0.497	-0.0379	-0.4683	-0.9737	0.2817	0.3396	1.2368	-0.11	-0.1233	-0.9971	0	-0.185	-0.6021	-0.4554	1.7032	3.5182	1.6483	1.7489	0.4082	-0.787	-3.7	-1.3193	0.3513
Downstream	146	29.6695	-5.5074	-5.766	-6.7721	-4.9045	-5.6179	-4.1241	-4.5274	-3.7724	-4.7301	-3.9123	-4.043	-5.4314	-3.7699	-4.1744	-2.2082	-2.1585	-3.7022	-2.5478	-2.1441	-3.4208	-2.6528	-3.2366	-3.0094	-5.0933	-4.4653	-2.7485	-3.8147	-2.4045	-3.4899	-3.134	-2.7299	-2.6214	-1.9942	-0.8845
Downstream	147	-3.641	2.0576	0.7545	1.9499	0.328	-0.3367	-1.0217	-0.381	-1.2895	0.3118	0.6753	0.6256	0.4981	0.0827	-0.052	0.4554	-0.552	-0.6898	-0.6744	-0.5836	-0.416	-0.2091	-0.6342	-0.9469	-1.6158	-0.3271	-1.4532	-1.2839	0.0241	-0.1541	0.8713	1.0134	2.0223	1.7842	0.0566
Downstream	148	-31.0951	-0.324	1.5594	2.0367	2.2446	2.6317	3.4686	2.6912	2.5333	2.2455	3.1869	3.5446	2.6562	1.3017	1.4398	2.1754	1.0068	2.1102	3.1184	3.3239	3.5749	3.6088	2.48	1.9929	3.424	7.3113	2.8621	3.1743	2.9231	2.2007	3.7212	4.9487	6.4459	1.8103	1.9299
Downstream	149	-6.1111	0.4261	0.4911	0.8337	2.3942	2.3882	2.2428	1.5603	0.5821	-0.7325	0.5474	1.7359	3.0228	3.3254	1.8987	0.0069	-0.0647	1.7954	0.7237	1.7687	0.2109	-0.697	-0.1737	0.7275	-0.2676	1.6234	3.6218	3.8951	5.855	3.9816	5.5597	1.8008	0.719	0.4635	1.6863
Downstream	150	-1.163	4.693	0.7725	3.4005	3.8024	4.6914	2.4403	1.9726	1.7076	2.909	1.3461	2.6443	2.9803	1.5078	1.5692	3.423	3.0599	2.9619	2.2914	3.1984	1.3934	2.5141	1.2196	1.7239	1.7299	3.6599	4.0678	1.9044	0.3465	-1.0445	0.2257	1.8371	1.9875	3.499	3.1405
Downstream	151	10.3542	8.1423	4.5936	3.6864	6.0374	4.7636	4.3764	3.6619	4.8511	3.7756	2.6854	3.6659	4.3568	5.8082	4.3008	7.9393	6.2479	4.1028	4.7841	5.9057	4.992	3.0008	3.8393	6.7851	9.1239	7.6173	6.3171	4.7342	3.5548	3.3445	4.3398	4.4027	4.3318	5.3718	8.7292
Downstream	152	0.1122	-0.1157	-1.2486	-0.1573	-0.1349	0.1363	-0.0261	-1.176	-1.2627	0.0898	-0.61	-0.7894	-0.8343	-0.6995	0.1881	-0.6616	-1.3538	0.139	0.8532	-0.9606	-0.9729	-0.4269	-1.5183	-0.7998	-0.7901	-1.5191	-0.3706	-0.3848	-0.0884	-1.0709	-1.2402	-2.0712	-0.3568	-1.1476	-1.1287
Downstream	153	6.5994	16.667	17.515	27.4815	17.2024	14.1611	15.2582	12.3209	12.6837	13.9625	11.8354	11.6375	18.3007	13.504	12.2184	10.8082	10.6097	11.0426	13.9001	9.7796	9.3618	12.4935	11.693	11.3871	8.1051	9.1745	9.9591	13.2316	15.313	9.9697	15.2171	13.5559	8.4105	8.9184	10.4614
Downstream	154	31.3333	1.5527	1.4605	0.1018	0.2949	0.5531	2.3981	1.1974	1.0808	0.4885	0.3098	-0.2471	2.0316	1.1269	0.7802	1.3745	0.6272	-0.0399	0.2379	-0.3004	-0.0158	-0.3385	1.5171	1.3519	2.5643	1.8554	2.5868	1.1453	-1.3403	-0.3985	0.3838	-0.1449	0.595	0.1269	2.1578
Downstream	155	20.8787	2.1497	1.178	-1.8192	-0.4342	-0.3296	-1.165	0.8997	2.1118	0.9203	-0.5184	-1.3925	-0.4602	-0.0675	-1.1025	-0.9767	0.2557	-0.0421	-1.0885	-0.8855	0.3892	0.0361	0.0547	0.8535	0.0442	-0.4291	0.1104	0.7278	0.9488	0.6947	1.1857	0.3568	-0.6492	0.2208	-0.106
Downstream	156	-1.0096	12.8585	12.8923	13.5832	13.0201	17.1404	10.0736	24.629	14.033	9.91	13.9571	21.6701	21.1175	11.5701	13.0217	13.4769	11.7782	16.072	11.9755	15.0491	12.5519	10.545	16.625	10.5282	13.9919	7.5257	9.3863	15.0615	10.6695	7.5255	9.3493	10.2716	12.0164	10.822	23.4158
Downstream	157	6.4273	15.1901	17.9325	13.0337	13.6537	14.3494	18.355	13.1897	13.9094	15.6767	16.3332	14.5766	9.4882	8.9623	8.5011	9.793	14.9449	13.0557	15.6311	14.6153	9.4211	11.184	12.5089	7.0193	8.4632	7.4544	9.6893	8.1757	12.3455	12.3816	6.4369	8.3236	7.6945	13.7079	11.8548
Downstream	158	-2.9537	4.2433	4.2334	4.0088	5.2368	4.0445	4.3404	2.9389	5.5095	5.5878	3.2553	1.2446	0.6998	3.757	3.0265	4.5015	4.3965	1.9994	0.7989	1.987	5.7192	4.0302	5.1702	1.7337	1.1085	3.5113	5.7744	6.3716	4.1047	2.5008	1.5178	5.4898	2.6214	2.6988	0.9
Upstream	ISRE	-340	-330	-320	-310	-300	-290	-280	-270	-260	-250	-240	-230	-220	-210	-200	-190	-180	-170	-160	-150	-140	-130	-120	-110	-100	-90	-80	-70	-60	-50	-40	-30	-20	-10	0
Upstream	1	1.6056	0.2089	-1.7743	-1.7795	-0.9389	-0.5092	-1.828	-1.4571	0.7304	-0.3419	-0.1919	-0.8352	-2.0701	-3.9824	-3.0862	0.0295	1.6843	2.3577	4.3795	1.4947	-0.7431	-0.6115	-0.3081	-0.2892	-1.7949	-0.2051	0.6793	-3.4691	-5.4303	-2.5879	-0.3731	1.0464	1.0612	5.6418	2.8635
Upstream	2	3.4941	2.3473	4.3081	5.4939	4.8469	3.1916	4.736	5.2717	8.4283	4.0798	3.2041	7.0959	5.399	8.0067	8.9417	5.6063	5.8353	3.7849	5.0096	4.5434	7.5456	6.5985	3.7109	4.8218	3.7892	6.2796	3.4583	7.4072	7.3885	9.7341	11.5002	9.1444	8.0511	14.2575	61.6268
Upstream	3	4.666	0.9627	2.8879	5.3302	4.4189	2.815	2.1536	2.7016	-0.8143	0.5143	0.4439	5.4006	3.5969	2.6306	-0.6569	-2.5331	-0.7564	-0.4858	-0.8853	1.5965	2.5514	1.0965	1.939	5.0213	2.5834	2.0425	1.0803	2.151	0.2168	-0.3642	0.9347	0.9428	4.2014	2.9342	-11.2318
Upstream	4	-2.3057	-6.3679	-8.0727	-4.9002	-4.8569	-6.5774	-3.7322	-5.4855	-9.3867	-7.1892	-3.8266	-3.5578	-7.1623	-5.6167	-4.2491	-5.3909	-2.3231	-0.4565	-1.3216	-2.4898	-4.3621	-6.1068	-5.0315	-4.4881	-6.3607	-9.3883	-7.2989	-8.7238	-10.4905	-11.8879	-11.4897	-11.4791	-15.5234	-17.8655	31.9322
Upstream	5	-0.2037	1.8697	0.7915	-2.2394	-1.3482	-1.1815	-3.1983	-2.4117	-2.8349	-0.5509	-0.5338	-2.1739	-0.4046	-3.041	-1.5047	-1.8647	2.5017	1.0122	-2.1653	-3.3162	-1.2892	-0.2387	1.7409	0.6684	-0.7127	0.3195	1.6379	1.7717	1.9709	5.3677	5.111	9.0202	38.7488	71.8137	20.8524
Upstream	6	7.6487	6.8249	8.0363	8.4899	12.4054	13.1849	16.1618	10.7782	9.1393	17.5104	15.9016	9.7473	12.6985	12.097	14.5037	18.9289	8.5753	11.8415	8.3454	12.8976	12.3743	11.8399	12.3922	14.8131	10.6721	11.829	12.4802	12.4217	12.0718	12.7682	16.0222	23.9849	14.1086	25.4504	8.1217
Upstream	7	18.716	14.2217	16.5213	19.0876	13.1324	5.7642	14.1042	26.7224	13.0828	9.3925	7.6167	10.4446	10.314	9.526	9.5926	11.2585	11.0407	6.8556	4.2291	10.8217	12.8901	19.7098	21.307	10.4689	10.2622	9.99	11.2556	9.1866	15.9656	21.0378	8.5555	12.5027	13.3061	16.313	0.8631
Upstream	8	-3.1206	-2.0077	-0.4885	0.379	0.2702	-1.4833	-6.1633	-1.5554	-1.2294	-2.7246	-2.833	0.925	2.4152	-0.9188	-1.6594	-1.8804	-1.7101	-0.405	-0.5189	-0.3681	0.2399	-0.2859	-0.776	-2.2116	-1.9294	-0.4838	-1.9312	-1.8184	-1.3153	-2.9575	-1.9902	-0.6161	3.5743	8.4895	-5.2518
Upstream	9	22.5761	18.8055	20.9376	29.9226	23.5189	28.9856	18.0081	27.014	31.4745	28.6619	18.6933	15.1119	20.8269	31.5037	29.4954	24.0925	30.7358	24.8714	21.8162	18.8074	20.6716	14.2326	19.1708	18.1455	20.8274	25.6392	28.3449	30.2937	32.9857	32.9645	41.4722	33.436	41.1447	42.177	32.8143
Upstream	10	-1.2731	-1.1219	-0.8135	-1.5644	-2.4633	-0.2813	2.0096	2.5726	1.326	2.226	3.5039	1.3017	2.2788	1.421	2.0521	2.1241	0.9855	-2.5284	-1.1155	1.2177	4.0072	2.166	-0.1671	-2.8737	-0.0873	-1.5004	-0.815	-2.547	-1.8776	-0.2799	0.2006	-1.8528	-1.3811	-4.9559	-13.1575
Upstream	11	8.4462	14.7954	20.89	17.3318	9.5963	11.1806	12.3543	16.3095	15.517	13.5056	12.9223	12.8006	11.9973	13.5487	19.4861	15.8947	17.3254	6.715	7.8697	8.806	13.0467	19.5358	10.9556	9.4252	8.9537	11.5143	12.9751	9.7811	9.384	15.3478	12.0697	10.6829	19.4859	19.8773	50.0877
Upstream	12	0.3877	1.2902	0.6184	-1.1156	0.2941	-0.2973	-0.4453	-1.5946	-2.2803	-1.915	-3.3129	-2.8686	-2.3832	-1.6783	3.5702	0.7795	-0.4375	1.0377	-0.5973	-3.3826	-2.9583	-1.2178	-1.5681	-2.8691	-1.5606	0.3252	1.6281	0.7592	1.0767	3.0683	2.9963	0.946	3.1778	3.8064	-2.8693
Upstream	13	2.0102	-0.2567	0.1895	-0.5006	3.1054	2.5403	1.0196	1.2269	3.1728	3.4192	0.8499	3.4655	1.6711	2.474	3.1026	2.9862	1.2912	-0.0102	-0.3741	2.5584	2.3228	4.3252	5.9793	6.6853	5.3333	7.3043	7.2876	5.3433	3.4857	5.2305	4.5935	2.1239	1.3002	8.2982	0.8054
Upstream	14	22.421	22.1476	24.4018	17.9968	20.4147	26.5216	14.5096	16.9265	22.1094	23.1314	22.6541	21.0957	18.9862	18.8606	17.3	26.35	21.663	24.8559	25.1424	19.6309	16.6144	19.2545	20.1004	18.0149	15.8574	13.7652	20.4631	19.9373	18.4288	20.5863	16.3219	12.8362	9.8373	-0.3685	299.416
Upstream	15	9.6057	6.7583	8.6194	8.5	7.6737	8.8218	11.5383	11.7581	12.9471	8.381	4.1682	5.1514	10.5247	10.6359	7.9543	7.1661	9.319	5.1688	5.2954	8.0659	12.1118	9.1311	8.848	9.7143	14.1665	8.9348	7.0012	5.0308	4.2177	6.5827	5.5975	6.1134	2.4886	1.8664	8.1628
Upstream	16	-3.065	-1.4918	-0.1655	-2.9845	-4.8557	-1.8535	0.5317	0.0051	-0.6464	-0.7441	-0.4693	-0.7809	-2.4922	-1.5711	-1.2038	-1.0725	-1.0736	-0.6903	0.7678	-0.7952	-0.9925	-1.071	0.3151	-2.7435	-4.0667	-4.8058	-5.9502	-3.3594	-4.8044	-5.2342	-5.0141	-6.6227	-12.0408	-24.6744	-7.5524
Upstream	17	2.2114	3.4046	2.0766	0.7905	1.01	-0.5489	-0.5069	1.0755	2.654	1.9685	3.2097	1.7522	1.3791	-0.9907	-0.5115	1.523	3.2639	1.5382	1.3298	1.0924	1.1134	1.7105	4.4317	4.0292	5.1187	2.4982	0.9106	-0.7392	5.4806	8.5022	10.9405	10.177	9.2836	14.4978	19.2833
Upstream	18	9.4051	8.5897	7.8234	9.0792	7.0117	4.1764	8.1005	7.0122	10.7935	10.4295	8.1612	11.6687	15.2965	8.052	8.0474	11.0959	7.7126	10.1363	7.7266	10.0071	8.9983	8.5474	6.0689	4.5249	8.4406	7.881	8.8452	10.595	18.6459	16.48	14.2389	7.6919	5.4615	9.9402	20.4642
Upstream	19	2.5093	-0.1592	0.5163	1.0447	0.0896	-0.804	-0.1872	-1.5222	-2.3652	-2.0978	-0.8006	-1.2427	-1.4198	-4.12	-2.8201	-0.4523	0.2692	-0.6589	1.2996	-0.0221	-1.9195	-2.1823	-1.6459	-0.2363	-0.7543	-4.9783	-4.5392	-1.2185	3.6065	6.0743	3.0378	3.4154	5.2991	4.0429	-6.3546
Upstream	20	1.6571	0.9524	0.7908	1.5203	0.3987	-0.2233	-0.3735	3.3049	3.1877	0.2324	0.3146	3.2173	4.6144	2.294	1.0286	2.7824	4.9403	6.2353	7.5503	8.9626	3.0458	1.1573	-0.2913	0.9355	0.5874	1.6136	2.5472	2.9881	3.3977	5.9665	8.0103	8.0699	12.3543	23.1486	7.1136
Upstream	21	-0.3918	2.1822	4.837	2.3545	-0.3728	1.0667	0.6277	2.0206	1.2688	3.103	2.3647	1.1303	1.3161	5.7896	4.1258	2.37	3.414	2.0801	2.3916	2.2185	1.7717	0.9466	1.4535	1.3364	-0.0407	1.6584	2.8759	3.0967	0.6292	1.4772	1.4985	2.4358	9.1117	12.8671	14.4187
Upstream	22	-5.6375	-4.8204	-4.1691	-7.3325	-4.8046	-4.5015	-3.1846	-3.7323	-4.3394	-3.8327	-3.6094	-3.4601	-6.0454	-4.8633	-6.1203	-3.6426	-2.6382	-0.5776	-0.6656	-3.1045	-0.2463	-0.5727	1.4333	0.4174	-1.2347	-1.4848	-1.0265	0.6673	3.4625	4.3173	10.8536	24.1927	54.734	70.3647	26.1194
Upstream	23	4.943	14.7044	9.9484	8.4421	4.5978	5.872	5.4064	3.6161	4.6849	6.0213	6.0138	8.7751	7.0366	7.548	5.2163	10.839	11.7837	21.0028	8.5466	8.9056	14.4583	12.3625	12.0474	7.8743	14.3817	12.8426	19.4559	16.4222	14.0595	12.9556	11.6735	14.1044	17.3747	17.1193	1.1568
Upstream	24	0.6998	2.5723	3.8318	1.6026	0.1561	1.1803	2.7233	4.4431	2.8395	1.5868	0.3542	1.4797	2.407	3.4487	0.6987	1.5644	3.0639	4.1577	3.3516	2.8807	4.1328	2.3517	4.2831	3.2435	4.1913	4.1409	5.4662	4.0637	1.3803	1.892	3.3911	5.4907	1.1742	1.168	30.341
Upstream	25	18.76	17.8923	13.8128	14.8555	20.2469	10.7573	15.4342	5.3053	9.7505	14.2031	17.5701	20.9312	25.4054	24.4175	21.5012	22.3442	15.6445	27.1785	23.6829	16.9642	19.2225	33.1818	26.6219	35.8823	34.3375	37.8727	39.1695	22.6542	24.9504	30.9355	23.2022	19.9426	27.9678	19.1347	2.3159
Upstream	26	9.8566	10.5663	14.7351	10.9424	18.4823	10.641	13.4194	9.5717	13.6114	5.7152	10.7755	11.139	10.1595	7.4792	4.1822	6.1226	8.7663	6.4862	4.3842	4.6809	6.9118	6.2534	4.7585	8.7371	12.0234	11.9382	11.9349	9.9139	9.2179	7.6287	6.5727	8.586	7.0198	12.4884	64.806
Upstream	27	6.2572	7.9236	9.6757	9.0767	9.5728	9.3489	8.662	4.8622	5.784	8.9165	4.9477	8.9796	7.398	8.9999	8.6713	6.6669	9.0581	6.7184	9.6337	7.2821	9.1845	4.8549	2.8722	4.891	4.5973	9.0941	3.795	6.148	7.6696	8.1485	11.2474	8.8591	8.3794	9.0705	5.9529
Upstream	28	1.0898	0.9765	0.9217	0.5456	-3.2793	-2.0776	-3.1891	-2.1982	-2.6553	-7.1822	-5.4474	-3.0205	-1.2589	-1.1887	-1.7625	-3.023	-2.6787	-4.052	-4.4659	-5.12	-3.434	-4.1883	-5.3286	-3.0184	-3.8064	-3.635	-3.319	-5.3665	-6.5864	-8.3255	-6.7945	-7.9907	-11.5611	-13.1764	-14.6529
Upstream	29	4.8668	4.4033	6.6738	9.6025	7.0392	4.3617	6.6008	10.4334	6.6516	6.5138	6.5458	8.2284	8.7512	12.3327	7.2095	5.8207	8.4462	9.2084	10.2367	8.7947	8.3095	6.5198	5.7148	6.0183	7.1762	11.0375	7.3391	8.7105	6.2743	8.8632	8.0642	9.3397	13.039	10.9232	29.1909
Upstream	30	5.1628	5.5783	7.2823	7.8575	6.2977	8.85	8.1554	6.7088	6.0247	7.8321	5.4609	4.9209	1.9385	3.0784	2.9388	5.9712	7.5705	9.5481	7.7267	6.5052	6.9875	9.3873	10.8112	9.9284	10.6516	12.8678	13.6674	13.954	12.058	14.9893	11.1209	11.2472	38.0656	33.4647	20.5051
Upstream	31	-13.148	-10.7082	-9.4148	-8.3706	-10.3628	-9.034	-10.245	-12.3494	-11.4749	-14.9745	-6.8984	-10.2178	-8.2008	-9.1827	-13.1437	-14.4295	-10.0204	-9.379	-13.6212	-11.3986	-11.2293	-10.192	-12.2859	-12.8974	-13.4307	-12.0645	-12.8201	-9.0879	-10.089	-17.2862	-12.6022	-12.6523	-7.3719	-6.3984	-15.2279
Upstream	32	1.4636	0.501	3.8183	6.0336	2.0827	0.7768	2.7962	11.0241	7.0669	5.5382	8.5063	6.0581	9.1633	9.56	8.146	5.3537	4.4989	6.3443	5.724	5.501	4.8656	2.0077	4.4521	3.0162	2.5183	2.4351	5.1658	6.3537	8.608	6.2422	7.0013	4.9009	8.6881	23.6428	318.52
Upstream	33	7.9893	11.2432	8.9245	12.6575	15.4238	14.166	13.6063	15.9714	10.3638	11.2229	7.8255	11.8367	13.0075	14.7434	11.3352	8.2752	9.8063	8.4992	10.7003	11.5139	11.0067	15.1726	15.3815	19.435	14.9595	15.2135	10.1038	15.435	9.5396	12.2992	16.241	11.712	10.5802	8.88	3.9602
Upstream	34	15.135	12.8529	13.7153	12.0506	16.746	28.4856	25.6341	31.2685	16.0934	21.1524	14.6084	17.8038	17.5693	32.7572	22.8242	21.6504	18.4679	15.3272	14.7967	19.0986	17.7225	15.7652	22.7843	13.807	13.3965	23.2141	21.3717	15.8656	20.0459	24.9299	30.8358	21.9658	13.1517	-5.9504	214.172
Upstream	35	7.4122	3.8488	5.2485	4.617	3.3365	2.433	3.0772	3.2946	4.0332	5.4071	5.1053	8.1424	9.5829	10.3813	13.3985	8.7934	6.2743	11.3298	8.3162	3.7883	2.4265	2.9629	4.8418	8.6095	7.2901	5.2312	7.0622	6.4975	6.6287	7.3637	3.9424	1.2671	-0.7077	-1.4999	-7.0004
Upstream	36	8.788	5.4876	6.9016	6.3805	6.3067	4.7947	11.2907	12.9546	11.5084	8.5884	10.007	13.1757	11.8095	12.1505	9.5317	7.6737	9.2966	12.5869	15.3476	18.9232	20.1394	16.3721	15.1652	16.3998	15.3805	6.6649	11.3325	13.0537	10.5873	8.8662	8.773	12.0355	5.2464	6.6371	7.3126
Upstream	37	12.4112	7.9973	9.3931	11.8882	11.3892	7.3104	3.8284	3.2165	5.5632	12.336	10.5553	11.6231	11.923	14.5466	8.9669	7.9926	9.2839	10.5832	12.666	9.4203	5.9413	6.6518	10.4374	6.439	13.2883	13.0306	7.9907	9.645	6.6137	7.9077	9.675	13.2058	6.2858	16.152	6.4789
Upstream	38	0.3375	2.6196	1.6599	1.5893	1.9741	0.7562	-0.1376	-1.4098	-2.8229	0.1908	0.3348	-0.6326	-1.4446	-1.3186	-2.7213	0.1101	1.8314	2.0223	0.0931	-0.3563	-0.7352	-1.1632	-1.7816	-0.9983	1.0602	1.6544	1.5091	1.5796	0.7845	-0.5944	1.4785	4.3787	11.6238	10.0009	14.0322
Upstream	39	-0.6807	0.1999	1.2279	0.991	-0.8335	0.9341	-0.2339	-1.5198	-0.5163	-1.4366	1.2425	0.0093	0.3117	-2.1259	-0.0052	1.094	0.3269	-1.8387	0.0944	-0.0388	-1.0861	-0.7147	0.2011	0.8989	2.7646	4.5962	6.4682	5.2596	3.7033	4.0462	6.1822	12.5494	33.9549	36.4758	7.6909
Upstream	40	8.9174	9.7072	8.8231	19.2953	17.5879	13.6256	18.0699	19.379	19.2929	20.1127	21.5649	14.8032	20.6945	15.2763	16.8405	14.4274	18.97	18.2964	20.7839	16.7116	17.9619	17.3517	18.3092	18.447	17.4271	15.9249	21.0583	22.2654	21.5206	14.0646	14.9409	24.5121	22.3432	17.5463	4.7838
Upstream	41	0.7905	-0.7527	0.1255	2.5659	1.9439	2.1713	0.3394	0.2413	2.5621	3.0802	1.4934	-1.7346	-0.0196	0.9964	-0.201	1.0991	2.4417	0.2627	1.9836	2.4235	2.8221	3.3853	3.2395	3.3309	1.2285	1.416	1.519	0.553	2.3762	3.702	0.4443	3.5744	9.6991	3.1697	-5.488
Upstream	42	-3.2671	-4.891	-1.7875	-3.9418	-3.0362	-0.3258	-0.3599	-0.8846	-3.8283	-4.3647	-4.6562	-3.4255	-2.7119	-1.8966	-0.5154	-2.0502	-1.2964	-2.679	-2.0699	-1.0814	-3.0475	-3.0185	-2.6512	-1.0663	0.0888	-2.4712	-4.2147	-3.1915	-1.0965	0.7649	1.7314	8.9435	36.3057	44.9307	21.9385
Upstream	43	15.3623	11.144	11.5004	12.3876	11.8479	10.8773	8.6946	11.7431	10.9629	12.3292	14.1358	18.5138	13.7436	13.2556	10.2168	9.9885	12.9783	12.5939	13.937	10.2393	12.0728	8.1723	16.6815	15.8533	13.2079	9.5892	9.356	7.6928	8.8673	13.9087	23.2543	19.582	22.9107	27.1057	23.9252
Upstream	44	-0.1277	3.1474	1.0784	1.7778	1.754	1.1785	-0.775	0.7297	2.7215	-1.886	-1.3177	-3.3929	-3.5451	-2.9425	-0.7693	-0.7353	-0.7052	1.2394	0.6295	-0.737	-2.6879	-2.0486	-3.5871	-2.7156	-2.3682	0.0977	-0.5044	0.1679	-1.5921	-1.4607	-2.8382	-2.4633	-3.7884	-4.3853	-0.7964
Upstream	45	7.2559	7.6172	5.9585	5.0339	4.6582	4.1143	2.5603	0.732	2.1909	3.5315	2.9519	5.1888	7.3839	7.3081	4.1025	3.7843	1.3748	1.2584	5.8058	8.1515	4.5415	6.6087	7.4129	6.884	5.788	10.9935	5.9818	2.5918	7.8133	7.6751	4.3247	0.4994	2.1948	6.0661	5.8937
Upstream	46	-5.8373	-5.2545	-8.2843	-6.3732	-6.7288	-7.7054	-6.1995	-4.4731	-6.575	-5.406	-8.088	-7.7758	-8.6011	-7.532	-7.2153	-5.2916	-4.1669	-3.1865	-5.0508	-10.9474	-11.8312	-7.5543	-6.1162	-9.2766	-13.3116	-8.394	-10.4795	-6.5541	-6.1196	-9.3893	-13.415	-14.7658	-14.3189	-22.9107	-20.9499
Upstream	47	-0.2947	-1.6399	-0.6564	-1.0659	-2.353	-1.9125	-0.3689	0.9502	1.6125	3.4144	0.2308	-0.668	-1.6587	-1.6956	-0.8	-2.4926	-2.5926	-2.2764	-2.685	-0.7306	-1.8565	-1.2153	1.4244	0.7862	0.187	-1.348	-0.1337	-0.7759	-0.5009	0.1482	1.5297	4.2888	0.9043	7.5488	5.6691
Upstream	48	2.4001	-1.1653	-0.2187	-1.6529	-0.6783	-0.7669	3.1781	3.292	3.6663	3.4375	5.1863	1.6682	0.1436	-0.3448	1.0135	3.9354	4.4853	2.6387	0.6386	-3.4831	-1.997	-0.9679	1.4333	3.334	2.8764	2.0666	6.8717	5.6386	1.6496	-0.1176	-1.1639	1.8089	0.4123	-4.341	31.9823
Upstream	49	1.5636	1.1416	0.9252	0.9636	4.2353	4.2965	2.5943	2.0425	1.471	0.5259	1.3717	1.9196	2.7799	-0.778	0.1488	0.7068	1.3772	2.6443	1.3713	5.1849	3.1528	2.3543	2.768	3.8566	5.4571	1.6967	0.0798	2.7813	1.6477	0.5302	0.9117	6.9533	7.3632	7.2802	1.2313
Upstream	50	5.1711	6.1125	3.723	5.0641	4.1422	8.7646	10.0656	10.5371	8.3713	14.0431	13.7907	10.8838	12.4685	16.11	9.9036	7.5058	11.3839	12.2292	6.6215	6.0488	6.2319	6.62	6.1231	5.3398	6.6917	11.6147	9.2734	9.0232	10.0026	4.6568	6.3616	5.8684	2.4713	4.3793	-1.649
Upstream	51	-1.3908	-2.7923	0.2022	1.5328	2.3186	2.141	0.0244	-1.5545	-4.2816	-2.5756	-2.0397	0.5869	1.0113	0.9453	-0.2698	0.2624	2.08	2.3055	1.722	-0.8577	-3.1004	0.495	1.1251	1.1962	-0.2385	1.4503	1.8396	-0.2804	2.0682	3.6275	1.4347	-1.1842	-0.5425	-3.8776	15.6009
Upstream	52	2.5509	-0.9553	-1.1613	0.7612	0.4817	-2.1285	-0.6538	-0.0553	0.9585	2.6243	1.7535	2.8642	-1.3533	0.0286	-0.0972	0.1611	-0.9022	-1.1669	0.419	0.4256	2.0262	0.6263	2.6157	1.8475	6.8492	4.8684	5.4059	1.9718	1.8544	-0.3992	1.232	-0.6378	-1.0166	-2.4934	-7.7356
Upstream	53	-0.7042	0.7753	1.3	0.7858	2.3546	2.3607	2.1384	5.561	4.8472	6.4861	3.909	2.5694	0.7978	0.8807	1.714	1.4821	0.9672	0.76	2.8766	7.6879	7.9532	4.3952	5.6594	6.3387	6.5455	3.3785	5.3103	4.289	2.1144	1.0789	4.2306	4.072	2.0544	0.3899	-4.8741
Upstream	54	-0.9078	0.3964	1.5396	0.2963	-1.523	-1.0952	-0.4622	1.7371	-3.114	0.378	0.9569	0.0739	-1.3708	-1.6954	1.5858	0.4859	0.2691	0.1386	2.4141	4.9234	1.3769	2.9317	2.5771	-1.2798	-0.1788	-1.408	-3.0432	-4.7294	-3.7421	-2.2016	-3.4767	-3.9022	-3.2216	-3.9302	-9.2711
Upstream	55	4.4224	7.2663	4.5063	7.5631	10.5778	9.0281	12.5008	7.0128	8.8295	13.2069	10.1076	12.4608	13.4538	10.3027	8.9339	10.1242	12.0592	14.2971	11.1088	10	11.5393	5.9644	11.9326	9.9651	9.4294	11.9912	17.3954	8.1123	9.4822	5.2122	8.6936	5.0756	4.0328	4.6898	-4.8334
Upstream	56	-3.6821	-2.6389	-3.3666	-4.6177	-3.6896	-1.6887	-0.2716	1.2527	-0.6405	-1.0143	-2.1299	-3.3463	-4.1745	-3.9902	-2.3868	-2.617	-3.0391	-2.6267	-4.6096	-1.9703	-2.0911	-0.946	-0.1289	-0.3088	-4.0252	-5.8014	-8.0156	-4.5473	-7.4611	-6.6434	-8.5807	-12.2172	-12.5354	-14.7672	-18.3545
Upstream	57	12.5896	13.6642	21.185	15.7794	11.8303	6.0509	9.1227	8.4228	9.9425	12.0096	11.9053	10.0177	8.5563	7.9761	7.4179	5.1751	7.5498	8.1496	7.4773	13.4277	10.9985	13.2149	10.8325	11.5863	11.8994	9.6918	7.2161	10.7778	11.255	11.2855	8.371	10.561	7.9548	3.6153	33.2908
Upstream	58	-6.2807	-7.0392	-5.2974	-4.2059	-6.3808	-6.5879	-4.9348	-5.3526	-9.1051	-5.3465	-7.3127	-4.4913	-4.4821	-3.3993	-7.4241	-6.5467	-4.3476	-5.8644	-5.5985	-6.3673	-5.3205	-4.4161	-3.1992	-5.0226	-2.2531	-3.2511	-3.1704	-0.1306	0.7803	2.1011	3.9744	15.8201	43.1387	48.1346	19.0164
Upstream	59	10.5049	7.7181	5.2513	5.3169	7.2726	7.4822	9.6858	9.7302	4.8518	1.27	1.3562	8.5955	8.2874	2.9691	3.7554	4.8648	7.1546	9.9749	9.545	10.282	6.14	7.3903	13.0034	12.6872	10.3986	6.9488	5.2427	13.6478	8.9125	9.3624	7.6273	18.0912	38.6891	49.192	31.149
Upstream	60	1.696	1.5244	-1.6025	-3.3173	0.0152	-2.6281	-1.4012	-3.3523	-2.3342	-2.7125	-3.2444	-4.582	-4.6627	-4.6787	-3.4442	-1.4451	-2.9604	-3.3512	-3.4964	-1.4591	-2.2762	-2.0592	-3.7802	-0.8975	-1.4766	-2.0498	-2.5983	-2.2945	-2.6957	-3.5626	-3.8632	-4.8256	-9.9433	-13.3314	-14.2397
Upstream	61	4.0862	5.2757	5.5036	3.84	2.0046	3.6437	4.2161	5.054	13.7498	5.4016	3.6379	4.613	8.1064	7.2411	8.5425	4.6364	7.3289	7.2153	6.0678	5.0628	4.2566	0.9981	-1.2118	1.7647	3.0207	6.7499	4.7599	4.9196	10.8536	6.1134	8.4687	2.3779	-0.0788	-2.4392	-2.7048
Upstream	62	-0.1547	-0.5056	-3.544	-4.6978	-2.4921	-1.0269	0.4962	0.4703	0.0023	-3.7502	-6.7435	-5.747	-3.7347	-2.2508	-3.0408	0.1035	0.6135	-2.1516	-4.5022	-4.2993	-3.0969	-0.8042	-2.0446	-1.8161	-1.5588	-2.8091	-2.431	-0.9935	-4.1083	-4.6384	-5.9593	-6.8319	-8.385	-5.1265	-10.1985
Upstream	63	7.5696	6.1311	1.1315	4.0797	2.666	1.7141	2.1691	2.0802	2.5963	6.3377	7.4521	6.1768	5.0271	6.9318	3.1612	1.2176	1.7785	4.7	5.1206	5.4113	4.716	8.0957	1.1517	2.7637	6.8169	5.4211	3.4663	4.8168	3.9269	4.0239	2.7004	2.1921	-0.1179	0.1249	4.7426
Upstream	64	5.2724	5.4539	8.8974	6.5068	7.5987	5.4641	8.1426	5.7174	3.6342	2.8192	4.0861	4.0549	5.1402	3.5084	3.04	6.4089	5.1097	2.8478	1.4955	1.9057	5.4912	6.1427	4.8512	5.6893	4.1098	2.6664	2.1021	4.9206	3.8429	5.9901	5.3849	4.5793	-1.7389	16.8067	85.4162
Upstream	65	2.0869	0.4673	2.9958	2.5076	0.5602	-1.8512	-0.4652	2.308	2.2905	0.3611	-0.1702	-0.32	-0.8435	-0.1126	2.1964	1.1607	-1.964	-3.2028	-0.8263	-2.2046	-5.5902	-4.3876	-3.0428	-0.2001	-0.5108	-2.0906	-1.2525	-0.501	-1.1083	1.4602	0.2257	-1.1083	-1.1203	-1.774	-7.7492
Upstream	66	24.7211	32.8983	42.1509	26.6601	30.3362	28.0568	25.5571	35.2037	35.6256	35.6298	30.3634	37.3094	31.2932	44.1909	30.3559	35.3543	27.982	47.6963	35.9377	34.0339	42.1676	27.5749	36.6313	27.8348	21.5981	32.8869	33.8101	34.8626	36.8933	43.1503	38.2669	32.4833	26.2508	14.5638	-6.2064
Upstream	67	-3.6279	-4.6223	-6.4754	-5.512	-12.5566	-7.8522	-9.0106	-5.965	-7.0639	-6.2224	-9.7639	-8.6841	-8.9766	-5.8973	-5.4271	-6.0084	-7.3046	-3.9065	-4.9991	-7.4948	-10.0807	-6.6572	-4.9835	-6.9571	-8.4062	-7.9774	-7.7585	-8.5357	-10.7432	-5.8665	-8.3029	-14.031	-12.8567	-11.0427	-23.0113
Upstream	68	24.1067	27.7775	28.0531	23.2883	21.0931	21.7657	22.7537	23.082	32.1919	44.7019	31.9459	33.9554	39.8969	29.2412	46.3261	38.5536	29.1322	42.5514	36.617	28.2951	31.9979	38.0119	22.8532	23.0857	31.4011	31.5165	33.9188	42.4041	34.475	29.8724	42.7341	29.3067	57.315	85.3305	106.237
Upstream	69	27.7496	19.7773	25.5705	25.4259	21.3965	18.2616	14.6524	25.9733	27.2064	18.7355	20.2905	22.9028	20.9614	20.2054	20.5466	20.0178	30.7236	29.7204	35.7125	32.3134	25.1027	28.459	22.0009	22.8134	26.3218	23.9983	27.4232	21.8489	27.9863	24.096	25.8081	28.9176	13.9955	28.8173	17.7308
Upstream	70	0.102	1.1228	1.0402	1.6221	3.4824	3.526	1.7595	-0.1697	-0.4258	2.6616	4.1162	5.2084	3.625	1.7416	1.3504	1.7824	2.1741	1.4389	3.4883	3.1111	-0.0035	4.9567	0.4422	0.0413	0.3422	5.7484	3.4562	2.2493	0.5701	0.0446	-0.6729	-0.9073	-1.2571	1.3921	-3.3402
Upstream	71	10.5499	10.4875	7.5076	8.5179	9.0077	8.4317	10.6177	4.4439	4.2109	5.0277	5.2486	10.2944	9.3632	8.2573	8.4373	5.9299	5.6161	5.5587	10.0973	5.5384	7.6236	4.9911	11.6588	13.7749	11.5431	5.7991	2.5336	7.2413	7.4012	4.8066	7.1096	10.696	9.5664	6.9351	40.6149
Upstream	72	4.0776	1.5657	1.5212	3.7163	6.4071	7.7831	8.9039	6.5984	8.8808	7.7863	9.2211	14.1928	10.7721	7.8233	7.2406	4.6902	4.9157	4.5138	4.8118	3.3677	4.7569	7.971	5.8064	6.2952	6.5703	5.8197	8.7153	7.7505	9.7933	5.8781	9.9624	5.9457	1.9687	-3.1728	14.7961
Upstream	73	5.9443	3.6439	4.1177	3.0378	3.5336	4.8566	5.8752	5.5632	12.3824	4.6801	5.3782	6.1973	6.7792	10.8685	4.1277	2.6038	4.4887	9.9918	5.7122	5.8116	2.2504	3.3623	4.9532	5.3037	5.79	2.7828	2.3683	6.2586	6.5403	8.3983	7.3229	4.1727	3.688	1.6863	-5.9037
Upstream	74	1.6493	-0.6507	3.2192	9.3942	8.0041	8.6884	7.4127	13.4062	5.8066	4.6432	5.7267	6.7652	8.1535	4.4676	2.4641	0.5541	-0.3902	0.3176	1.8813	3.723	7.5906	7.1384	3.9378	4.124	2.1587	4.213	5.7425	4.0551	5.1166	10.3039	3.7407	2.979	0.1946	1.9813	1.63
Upstream	75	0.4333	-0.7595	-3.2627	-1.8956	1.706	4.0721	3.7797	-0.0559	-1.5408	-0.2241	-0.5847	-1.3733	-0.2349	1.7127	2.2731	1.4708	4.2245	2.222	-1.2064	-3.1914	-2.7092	-2.3999	-3.7514	-3.3902	-3.0952	-2.4909	-2.215	1.5308	0.2058	-0.3942	-2.5083	-3.0467	-2.4892	2.1338	5.5097
Upstream	76	0.7048	0.9537	3.1006	1.3534	2.4376	2.6913	4.7954	6.1564	3.3975	2.6275	3.1323	5.208	1.6202	0.898	1.5561	-1.5409	-2.8673	-0.456	3.2864	2.1126	0.8883	0.5179	1.5641	1.0775	-1.5664	-0.7858	-0.5024	1.6097	2.5133	2.9682	1.9127	2.8127	5.2585	6.7656	-2.4743
Upstream	77	-4.4358	-6.5023	-7.3092	-8.208	-5.546	-6.5531	-4.4483	-6.811	-8.7609	-8.606	-6.153	-7.3399	-7.0708	-4.9329	-6.1842	-3.7578	-5.1013	-2.6377	-6.6219	-4.8256	-4.802	-6.7189	-9.6628	-7.5275	-6.0979	-6.1852	-3.422	-4.5307	-4.6702	-5.1178	-9.1004	-5.6571	-4.4944	-1.1339	-7.8795
Upstream	78	1.8729	1.0795	2.1658	2.3592	5.3829	7.9445	11.4731	7.4504	9.3775	6.3642	8.3696	10.0583	7.5967	7.2197	7.2841	6.3906	5.6558	7.8768	5.0879	8.1431	7.2995	8.089	6.2777	7.0134	6.6062	5.5229	7.7032	16.1251	8.1444	6.9089	7.6845	10.525	13.592	16.8755	3.5552
Upstream	79	14.0517	26.2241	25.0432	19.8809	11.5287	14.3399	13.8439	14.7651	19.0143	14.5064	19.1916	15.039	17.3039	15.3761	20.3508	14.5856	10.6731	11.6066	15.2177	17.5832	12.457	19.8593	15.6272	22.9501	16.7393	19.2261	15.9511	15.1343	16.5609	21.837	30.5176	21.9799	15.9437	24.4165	9.3292
Upstream	80	16.6935	18.4599	16.3458	11.4578	10.2699	13.8477	11.429	19.9495	16.8774	16.0898	23.8377	19.3815	16.8234	18.9117	18.548	13.3431	17.9756	14.0315	13.7716	18.2942	22.6147	20.184	18.5232	10.0054	14.3508	18.5256	13.9179	13.7802	13.3667	11.8018	10.7538	16.9661	18.7051	23.1473	5.7198
Upstream	81	20.0843	21.2533	25.5311	20.5194	26.2739	22.3254	19.0494	30.9046	24.3302	16.0075	23.0562	39.8004	24.5928	24.5248	30.2502	21.5983	26.4307	22.6936	27.6445	25.1445	24.5806	27.0086	33.5955	25.9612	26.9288	22.507	24.7805	24.5565	22.9062	28.6613	29.9429	26.7863	42.8873	60.6247	128.674
Upstream	82	10.6332	13.798	14.1407	12.016	7.982	9.6222	11.9839	14.1572	16.3057	14.7953	15.171	9.3931	11.4007	14.8081	15.2997	18.7006	14.7303	19.8752	16.5005	8.6593	12.1227	10.5385	9.7208	16.1112	14.2367	9.8751	11.5167	12.1358	7.5279	15.9741	14.848	14.3045	5.5434	9.2897	5.7362
Upstream	83	-2.795	-3.5586	-4.5268	-5.5599	-5.5231	-2.9051	-3.5389	-2.0586	-1.1834	-4.7924	-3.6811	-5.0286	-3.3855	-3.5452	-1.3826	-4.0694	0.2615	-2.0011	-3.7728	-2.0804	-2.624	-0.809	-1.4035	-3.9772	-4.5332	-3.8611	-6.7575	-5.3848	-6.1115	-4.668	-7.0916	-9.9545	-7.3275	-4.902	-3.2361
Upstream	84	-1.8583	0.8959	-2.7869	-3.1683	-0.3108	0.0497	-1.0869	-2.9916	-2.2028	1.9169	2.1129	-0.7555	0.6292	0.5099	-1.7577	-0.4424	0.633	0.2897	0.2154	-0.8312	-1.1891	-4.1561	-4.5612	-2.2139	-2.1827	-1.4642	-1.4878	0.0524	-1.5236	-1.5525	-1.4075	0.0669	8.4352	9.9088	2.7441
Upstream	85	-0.1969	-0.2325	-0.39	0.7652	1.3551	2.0404	1.6927	0.3082	-1.7142	0.6045	0.7091	-0.9278	-4.2214	-2.8498	-0.683	-0.2002	0.8226	1.042	0.0712	1.6465	0.3296	1.2861	-0.7617	0.2405	-0.1129	0.2892	0.8681	1.4628	1.0655	0.5636	-1.5715	-2.1738	-3.2609	-4.9318	59.7948
Upstream	86	15.6471	16.5613	21.6534	23.1974	12.7519	23.4469	20.7284	16.6709	18.2977	18.7034	19.0954	25.1603	19.8341	22.5257	29.8333	27.6344	18.5836	22.224	19.4124	22.8649	20.686	20.8615	16.6479	14.2224	26.6468	27.7461	21.3881	19.0553	24.4268	19.8657	18.5456	17.0058	14.3137	11.9511	313.949
Upstream	87	3.9688	5.5459	8.5112	8.4019	9.6433	9.9592	6.8749	5.3859	5.1994	8.4501	6.3229	8.6128	13.6107	14.0832	11.9091	5.2256	11.6025	11.5522	8.7452	4.0569	5.3806	5.7805	6.1596	10.3124	6.4816	10.9258	10.137	11.3077	10.2193	7.6435	8.7647	11.2404	11.992	13.3538	12.0283
Upstream	88	28.5378	31.8099	22.7468	22.551	27.6654	29.02	26.2061	25.8167	39.2292	24.8114	27.3995	33.5113	31.1887	32.9427	30.9757	40.0715	29.6799	30.5108	23.9706	28.618	26.6952	34.4604	28.6906	26.5292	33.7091	33.4877	29.4728	43.2548	38.0012	33.4244	29.2848	33.1053	17.8784	20.4442	20.8916
Upstream	89	7.2126	3.8634	8.8129	9.5442	10.6669	8.4792	8.4506	5.7944	8.5516	15.3829	14.4297	9.2514	11.9262	9.9407	11.3162	6.3488	9.4993	11.6528	8.516	7.9055	6.4704	6.1886	10.8592	13.993	12.7876	12.2095	16.4456	12.9135	12.3299	11.1377	17.2537	21.8299	24.2403	31.3476	14.2716
Upstream	90	-2.9491	-2.9942	-2.0362	-1.9254	-2.0965	-4.2913	-4.7222	-3.0425	-3.4857	-2.135	-2.4364	-3.7227	-5.9047	-1.6596	-1.3436	-3.1827	-3.982	-3.8704	-4.1847	-2.71	-3.2871	-4.263	-2.4276	-5.1895	-4.1689	-2.775	-5.7278	-5.5976	-3.4572	-5.5428	-4.4573	-7.263	-6.5121	-10.1816	12.3521
Upstream	91	3.8302	0.4474	0.7418	0.0398	0.8371	-0.3656	-1.7323	-2.1478	-2.1026	-0.5577	2.4047	1.9987	-0.6679	-2.6221	-1.732	-1.574	-2.0016	-1.5818	0.4644	1.1853	2.2233	2.677	0.6305	-0.3308	-0.1372	-0.2746	1.8673	2.7449	1.1077	-0.9575	-1.756	-1.8832	1.9122	0.9697	-2.9431
Upstream	92	1.43	6.2771	7.8991	5.2526	6.111	5.0188	3.9803	6.4747	3.7601	8.7885	12.5512	9.4811	3.2473	2.0016	4.3163	5.6772	9.0983	8.8687	7.557	3.6824	1.9709	7.7114	3.6841	4.0207	5.8778	9.4879	6.3876	4.2642	5.8523	8.6963	11.7311	10.3825	13.7025	6.5171	69.257
Upstream	93	2.8886	3.1647	3.4319	2.3254	0.864	-1.0072	1.8206	0.5913	2.0648	0.2492	1.0291	3.1132	3.9317	1.3535	3.7943	2.8823	1.7485	0.3639	3.8773	2.0818	-0.8456	-3.1887	-1.0009	4.1756	3.5669	4.1901	1.194	2.2007	3.4789	-0.2386	-1.566	0.042	2.8036	2.1665	201.69
Upstream	94	4.6809	4.5544	4.586	3.6296	4.0441	2.5748	6.5483	6.183	4.5016	2.4816	4.0101	8.8872	6.0395	8.802	7.8923	4.7591	6.2767	6.3718	5.0313	7.5921	4.6904	5.0087	9.5915	7.4315	8.2136	8.082	10.9712	6.9537	7.2251	9.5281	12.1011	13.4005	16.0696	29.0732	8.461
Upstream	95	7.6913	7.21	6.8728	6.221	9.4495	10.9054	8.3894	6.714	6.9211	11.8547	11.3112	8.7234	10.6856	11.2201	8.3333	7.5544	8.1068	7.9905	9.7152	10.7144	10.2957	7.6946	12.7265	17.1892	16.8873	18.8043	16.5011	18.5655	19.875	20.5827	15.5321	11.4719	5.5622	4.3165	-8.5503
Upstream	96	11.2092	10.4096	9.0935	6.098	9.2779	8.6753	8.4223	6.7036	10.0711	8.867	6.4788	7.3826	6.8213	5.7823	4.924	4.2968	4.1509	6.9846	4.938	5.8595	5.1082	4.7869	5.4853	10.4574	6.0383	10.2687	4.8074	2.6754	4.9437	8.0544	11.9942	10.7685	9.3086	11.2307	39.1768
Upstream	97	10.0637	10.6718	11.6495	14.1616	13.1347	17.2901	20.3669	11.4739	9.5931	9.8906	14.2324	10.8054	9.6157	10.8327	9.5747	11.2935	8.8603	17.252	16.7537	14.701	14.3902	13.2467	12.1932	10.2399	13.505	10.8608	10.5828	19.7451	17.3301	15.9065	13.8131	12.6113	4.9235	5.9194	-11.7773
Upstream	98	4.5869	3.039	5.7337	4.8002	5.306	1.2621	-0.8753	2.8629	6.7674	4.5442	5.1979	7.8409	3.8426	3.9714	1.3298	1.2595	3.1668	5.3511	9.2013	4.3587	4.4451	5.3155	6.9705	8.0459	8.6674	9.0812	7.9959	6.9063	8.8073	9.7395	13.3824	9.8734	9.1378	22.7171	44.0251
Upstream	99	-5.5913	-5.2644	-6.7097	-7.3686	-8.0505	-7.0665	-5.8678	-3.2824	-3.3023	-3.4049	-3.1573	-2.9204	-5.5507	-6.4315	-6.4626	-4.7582	-4.92	-6.6541	-4.6592	-5.0019	-11.6196	-8.1727	-7.0178	-6.6413	-6.973	-7.0357	-3.4564	-3.9415	-4.4419	-5.1169	-8.3812	-6.9047	-11.9659	-26.7072	-11.7278
Upstream	100	-2.3752	-0.2541	0.1102	1.2388	2.5862	0.0144	-1.7003	0.5416	1.6671	1.3817	0.1979	-0.3154	-1.9666	-2.2407	-2.0377	0.9215	-1.7792	-4.8175	-2.2789	-0.4155	0.2888	0.6402	1.4549	3.9076	0.7624	0.3863	-0.7878	0.6045	1.5958	0.332	0.6823	2.4298	-1.575	-0.9027	7.4103
Upstream	101	7.431	7.064	8.564	10.0198	14.4042	9.9279	11.4489	7.3546	7.7317	7.8765	9.228	7.5978	4.9069	9.1328	13.0487	7.7684	10.7534	8.6024	7.3694	7.5449	7.3764	14.957	10.2683	9.7792	10.7011	6.5539	5.5248	4.148	5.899	5.6604	3.8934	4.4184	1.9998	-1.9022	42.5372
Upstream	102	-2.5439	-3.2316	-1.2891	-1.0809	-3.7959	-3.7728	-2.8242	-2.4558	-2.4679	-4.1559	-2.5163	-2.1628	-2.9259	-2.4908	-2.1508	-1.9383	-0.0905	-0.6037	-1.6453	-2.9165	-4.6956	-4.032	-3.0863	-4.3752	-3.5212	-3.6552	-0.8103	-0.5541	-0.298	-1.188	1.0117	7.3111	20.8585	6.1225	13.5648
Upstream	103	0.7693	1.8626	1.3235	4.3044	6.7951	8.3113	4.0347	4.7963	3.4099	4.6302	5.4362	2.1099	2.2609	6.0877	6.3756	4.845	1.0476	1.2861	1.0217	2.0258	3.1242	9.0155	11.8666	9.1998	3.6311	1.0036	-0.0018	0.5003	1.6916	2.7483	-0.753	-4.0523	-6.0039	4.2178	4.2274
Upstream	104	-2.9374	-1.1249	-0.7637	-1.5839	-1.3526	-2.0837	-0.3971	-0.6895	-1.0128	-2.9155	-5.099	-4.4236	-3.5408	-1.0191	0.7855	0.3125	-2.2663	-3.1013	0.2746	-2.6605	-0.6753	-1.0852	-0.003	-2.0946	-3.95	-4.5013	-3.7486	-3.1738	-1.2292	-0.6836	-1.4728	1.2449	6.1888	12.8999	9.944
Upstream	105	16.9026	17.8761	20.2483	14.4315	10.8852	14.4653	7.7107	7.7266	9.8205	14.6951	8.7448	14.4512	17.016	19.2893	19.3779	17.5613	17.7729	16.8268	18.5259	17.5509	13.6833	12.5217	21.3809	19.9289	14.7561	16.8381	20.5814	15.4175	26.9796	16.3649	17.0374	18.5515	22.7755	27.5258	2.4162
Upstream	106	-0.7721	-0.7182	0.4397	-0.3568	-1.0325	-1.7457	-0.7884	-0.1896	-1.9588	-1.3138	0.2926	-0.3564	-1.2027	-2.4569	-3.1215	-1.0061	0.7779	0.7667	1.1489	-1.0141	-0.9634	-1.935	-2.1713	-1.1739	0.2034	0.2379	4.3374	1.1615	-1.1141	-3.4891	-2.2847	-2.4708	-2.3406	-5.1759	47.358
Upstream	107	2.0765	1.52	2.1795	1.0669	4.0835	2.9362	5.3608	3.8761	3.2677	3.8381	2.8992	1.4874	1.8258	1.7751	7.2178	7.2997	10.135	6.782	3.2247	1.7755	2.2253	1.3212	4.3631	3.8469	3.7245	1.7923	3.6483	5.6352	1.8955	-1.0964	-0.5945	1.9316	2.9533	-0.3203	-1.0175
Upstream	108	-3.3871	-2.491	-4.875	-2.2088	0.1857	0.4738	1.5729	-1.3446	-6.5402	-4.1362	-0.8769	-1.3036	-3.3843	-5.3968	-4.024	-5.2986	-4.3368	-2.951	-2.515	-2.6292	-4.5311	-2.1317	-1.2839	-3.0862	-2.1755	-2.3691	1.0013	2.2896	2.1591	1.7787	2.6395	0.7104	1.9911	3.0245	-13.9086
Upstream	109	6.6366	5.1168	4.4399	4.283	5.1591	1.6569	5.2975	5.2775	5.0141	3.9467	5.5936	3.7149	4.3214	4.8544	8.5098	6.045	4.6033	7.468	4.0143	8.3829	9.3081	9.7487	11.3017	6.1957	7.4224	4.0092	1.9984	4.8529	6.7504	6.2047	4.9775	3.8923	0.9936	5.7781	7.2961
Upstream	110	7.8499	2.3748	1.6983	3.7384	0.2273	-2.173	-1.8639	1.7737	1.0466	3.4237	3.6955	1.8898	1.9239	-0.2241	-3.8252	-2.7965	-1.3818	2.8877	6.4612	4.25	2.2662	2.5179	2.6759	7.4836	9.0894	4.9194	1.9034	3.6311	5.6992	12.9175	7.8489	8.1292	9.6682	7.1405	-1.3418
Upstream	111	3.6273	2.3005	4.0104	2.5492	1.0508	2.2658	3.1084	1.1445	1.4979	0.5205	2.9136	4.2434	4.1323	2.9713	2.2701	5.0805	8.3922	6.7255	9.3308	6.7684	3.9314	4.8955	7.1814	7.8648	8.6176	5.7073	8.6887	7.9989	9.5623	7.9994	6.9252	6.0509	3.9798	-0.2419	11.5462
Upstream	112	7.4643	8.0413	8.5489	11.1775	8.3045	7.09	4.673	14.2407	12.4284	7.9183	8.1273	10.6898	5.0357	8.0939	13.4004	9.7564	6.5406	8.981	8.1066	10.4592	8.6095	9.3244	6.8716	7.1358	7.365	7.672	5.4354	8.3029	8.4675	9.5244	8.3515	5.6888	6.4937	7.3761	-3.1468
Upstream	113	9.3139	10.7269	9.2673	17.698	5.3132	10.3903	7.6891	6.3306	5.8784	6.7102	6.6774	8.8227	7.7779	7.6133	8.4823	9.7869	12.0025	9.6731	13.0046	16.0623	11.7502	9.3711	10.2187	8.3965	9.0672	11.0616	10.3119	6.5232	15.9519	11.8896	11.9615	12.6679	16.0985	30.038	32.9059
Upstream	114	2.3983	-0.8603	-0.7954	2.3218	-0.4433	0.1253	2.1159	3.8038	3.1525	4.3766	1.9006	3.0773	2.525	3.589	1.4822	-0.0327	-1.0172	0.1858	1.5026	2.4786	1.4622	1.8377	3.0079	6.0664	4.4221	5.3416	1.8952	-0.3577	-0.2384	-1.1334	1.3405	3.6464	4.8836	7.5143	3.0148
Upstream	115	-0.3898	0.2771	0.909	1.1205	2.8024	0.1029	1.1705	1.7099	1.7103	1.4471	0.3168	-1.0391	5.8604	3.9415	1.158	3.5287	5.7396	5.1471	6.0975	6.9508	3.166	1.2894	3.1382	4.0428	2.6318	2.9584	1.8482	0.4236	3.2479	4.6654	7.7905	3.2804	1.7998	4.7616	0.7731
Upstream	116	0.2101	-1.8208	-2.3151	-3.1164	-3.6334	-4.4274	-2.6899	-1.8216	-3.7906	-5.1735	-7.5326	-3.7357	-5.1499	-4.4475	-4.3825	-2.3772	-4.2185	-3.6553	-6.6496	-8.181	-3.1604	-3.1609	-4.9794	-6.2553	-6.6566	-8.5744	-6.6791	-5.3119	-4.0287	-2.3799	-4.0494	-6.2925	-6.5273	-13.9068	-32.6971
Upstream	117	1.082	0.2036	4.7837	2.4581	3.7538	1.6317	1.7059	2.1144	3.1939	5.0081	3.3077	2.628	1.4184	-0.0158	2.3487	2.0706	4.1034	1.8015	1.2031	-0.3516	-1.1722	1.0155	3.1815	3.3389	2.1544	-0.7842	-0.2886	0.5011	3.7554	12.2244	9.6952	9.7609	12.4528	27.3324	30.6695
Upstream	118	10.5494	16.7529	12.9712	17.8116	5.6728	8.5406	7.0703	8.3486	8.0257	8.6882	11.1118	12.0385	7.8821	13.0582	6.5788	5.1634	4.3171	10.7423	13.4118	11.8061	8.3954	9.9671	8.271	6.8282	8.355	10.0154	11.5615	9.9775	10.7446	12.9814	17.1286	22.3219	35.6403	67.2814	107.57
Upstream	119	-1.2603	-0.9455	-1.5823	-6.6766	-5.2202	-3.9782	-3.4351	-2.5564	-2.2644	-1.3541	-0.8644	1.5548	0.6324	-1.5607	-3.709	-1.0686	-0.1108	-1.6094	-0.9429	-1.2539	-3.5428	-0.4234	1.2762	3.5896	-0.9069	-1.1128	-0.536	-1.7226	0.2852	-0.1407	2.8505	8.2307	35.6147	52.0334	41.3763
Upstream	120	0.5859	-0.909	-0.3512	1.2473	-0.3561	-1.0844	1.2313	1.5479	1.6776	3.0048	1.7445	4.6826	1.9232	2.3753	5.5554	2.301	-0.2255	-0.4862	1.68	2.9984	4.6153	0.9813	6.6172	4.5388	10.9247	7.3955	6.1932	0.5836	1.4724	1.2617	3.0402	2.1112	1.3488	0.4658	1.8233
Upstream	121	6.665	8.8487	12.2791	12.8907	10.6829	10.1537	8.6344	11.5206	7.9227	8.167	6.4662	5.814	7.1142	5.1268	4.3507	6.3211	4.9456	6.7317	7.6788	14.109	12.2889	11.3767	10.4254	8.546	9.3535	8.4003	9.0872	9.192	11.6975	12.5078	18.7346	22.1819	31.4344	58.9618	72.1503
Upstream	122	7.0892	8.8144	8.8854	7.2933	5.7284	4.0004	5.5788	6.3049	9.5087	5.5746	5.4331	6.118	5.2435	4.7844	6.0939	3.1424	7.6668	6.6568	7.8869	7.8058	6.6813	6.5889	9.5334	8.3252	4.354	4.3299	4.2783	3.9544	4.1867	3.9446	4.6877	2.92	-1.2796	3.4653	43.8271
Upstream	123	5.9041	7.2499	8.9741	5.3233	2.1685	1.8731	2.7827	3.5123	7.4831	5.7808	4.4695	2.4667	6.8296	8.3328	8.7547	9.9117	9.1211	9.3268	12.8775	8.2164	7.5622	5.183	7.8044	6.2436	7.8682	8.7709	4.5053	3.45	5.6702	4.353	0.7606	2.86	7.4675	8.4559	0.462
Upstream	124	-1.5305	-0.8031	-3.7006	-1.0383	-0.8203	-0.1257	-1.3523	0.9011	-0.112	1.21	0.6075	-2.3809	-1.2959	-0.5167	-1.4955	-2.8505	-0.9148	-3.2366	-3.1458	-4.5446	-4.4347	-3.3127	-2.2348	-2.3269	-2.7716	-4.3669	-2.4188	-2.2328	-3.1813	-3.8778	-3.9148	-4.4209	-5.7131	-9.0333	-6.2435
Upstream	125	8.7664	5.451	3.8628	4.1283	3.1156	3.3707	1.0928	2.9384	5.3569	5.7092	7.5385	10.4418	6.5404	6.006	2.4365	1.1953	0.8372	2.5372	6.3662	2.7551	3.7491	5.4613	8.9607	11.0128	6.7636	4.6321	9.337	6.4288	8.1824	5.5821	5.8184	8.7823	10.0585	14.74	15.2476
Upstream	126	5.512	9.1723	8.2762	9.5011	4.1925	4.2883	1.4005	2.8655	3.1188	5.3148	2.3146	5.5529	9.9318	8.6165	7.8475	5.1728	5.3179	6.3658	4.6734	7.0517	5.1998	4.8674	4.3717	5.7306	6.2508	9.5691	7.1099	7.7383	6.1369	4.1481	9.0055	19.0961	32.8593	24.0833	6.3407
Upstream	127	10.2222	4.4678	3.7105	6.571	6.8201	10.0846	8.0806	2.9951	0.7672	1.1264	1.7623	2.6393	2.7921	2.3394	5.808	5.5268	1.8329	3.4392	4.6553	4.5517	4.1309	2.0364	1.375	3.3217	2.5528	3.1937	3.6011	4.3037	4.0215	3.571	3.5986	1.9553	-0.8151	-2.4008	-12.7899
Upstream	128	20.4414	11.3185	15.5802	10.9256	17.5099	13.5897	12.477	12.1022	11.2545	18.2864	15.0978	12.8323	16.5182	12.4348	15.2634	9.5132	12.8169	18.5688	13.6615	14.3641	16.9065	18.5115	13.4337	11.588	11.9	9.0684	15.0485	18.2206	13.0973	18.3719	13.748	14.685	9.6573	17.5358	7.4106
Upstream	129	-8.3864	-5.4033	-5.753	-6.5869	-5.9331	-4.413	-3.4392	-3.3271	-6.106	-6.5766	-8.3803	-3.5976	-4.1912	-5.7939	-7.2948	-4.9427	-6.3721	-4.9456	-8.8346	-6.9611	-4.263	-3.6696	-4.7273	-3.564	-8.8222	-6.9607	-6.6866	-6.1481	-6.9408	-6.5363	-6.4986	-6.2961	-11.0799	-17.7902	-30.8212
Upstream	130	3.4449	5.1504	5.3197	4.9855	2.6687	1.8333	-0.6603	2.403	1.968	3.9621	2.6892	4.3871	8.2358	7.4033	7.803	12.7216	8.5843	3.4524	1.9105	0.7907	3.0585	9.1313	6.8254	6.9448	7.2702	3.5419	3.4636	4.297	2.1371	6.3352	7.3549	6.9478	8.1775	11.4954	2.9259
Upstream	131	27.7506	30.1918	29.4882	26.3305	27.1861	26.2485	22.1462	24.2051	24.9565	29.7016	26.9607	23.6576	13.8799	22.4765	32.2998	29.133	19.032	23.9612	24.8931	22.3235	28.151	25.3989	22.1883	29.5578	32.0682	36.2008	29.245	28.2792	35.3459	72.9459	32.801	63.0118	93.712	88.3888	37.9949
Upstream	132	11.6498	16.5122	11.6387	16.7149	13.4985	13.7957	12.7568	12.9913	12.7865	18.1207	20.6121	15.9771	13.2375	13.0102	14.8793	14.1891	12.6951	15.1474	11.7782	14.8247	14.7525	15.7397	15.7092	18.7303	16.5611	28.2978	23.57	23.9569	18.1508	24.0887	26.6531	29.3329	17.2666	46.8477	59.9989
Upstream	133	-3.8813	-2.8672	-2.6627	-2.3859	-2.4652	-2.1716	-2.0409	-2.0184	-0.496	-0.3647	-2.1675	-0.0275	-0.1414	-2.2322	-1.1376	-1.5742	-5.852	-4.8466	-1.3791	-0.101	-1.2626	-2.8993	-2.2323	-3.637	-4.1481	-3.6597	-4.7433	-6.3058	-5.2641	-6.5248	-1.709	-2.0258	-6.9986	-10.2944	-11.5001
Upstream	134	9.0605	2.9391	7.84	10.3424	7.8361	6.6685	6.2047	3.0774	7.7402	14.2823	9.2261	10.1363	7.0127	9.7145	9.9498	9.8418	6.3671	5.7247	8.4853	8.3769	17.2087	15.4779	12.2141	6.4862	7.7686	7.286	7.0466	3.9461	8.5573	14.9091	15.5772	16.1606	9.6438	10.2855	21.6037
Upstream	135	2.144	2.6949	1.5866	-0.5236	-1.7446	0.4749	1.5445	1.2973	-1.0739	1.5899	0.4562	-0.1446	-1.8248	-1.3313	-0.6376	-0.1174	0.9423	1.2206	2.209	2.0564	-0.6951	-1.3193	-0.5326	1.9331	5.679	1.8492	0.1728	-0.8143	2.8852	3.575	7.3897	6.9506	5.5195	1.7094	-8.1317
Upstream	136	3.0689	4.3655	2.5648	2.295	4.3317	3.2565	3.663	3.2485	1.2225	2.4487	5.4109	3.9844	3.3921	0.078	0.3333	2.7419	4.8057	3.8678	4.2559	3.7701	5.87	6.3036	2.261	1.5884	1.1499	-0.5879	2.4706	7.2952	5.6545	4.6482	6.4425	3.1793	-1.7982	0.1879	45.5805
Upstream	137	5.2777	4.1248	2.4434	3.1806	7.0906	7.8243	5.2358	7.2097	6.8041	7.263	5.0625	7.3189	2.8372	2.1268	6.331	4.9428	2.8302	2.6833	2.6389	5.1649	3.9516	3.4583	5.6393	6.199	10.7764	6.736	3.0284	2.4575	1.494	3.1498	2.3587	-0.3158	-3.7449	-2.2591	-17.4767
Upstream	138	6.2554	4.0948	3.6539	3.0466	0.9461	1.7718	4.4206	5.2169	5.9041	4.6753	3.1558	0.5803	1.2308	4.7733	7.6703	7.2289	6.0127	5.8923	4.374	4.4418	4.4192	5.8201	6.1336	3.9436	4.675	5.8938	5.7624	3.1534	5.5364	3.4243	4.5277	5.3444	7.5147	2.1667	-14.6123
Upstream	139	34.0201	31.0104	36.7721	36.3821	16.9763	18.7432	24.715	39.0659	38.887	33.9158	33.9977	30.3423	28.5238	26.4229	26.1155	34.4635	27.4951	34.8956	21.4458	39.9061	30.2458	42.2163	39.5399	38.5678	43.2011	39.114	39.3737	47.8782	40.6791	38.0827	39.5792	40.9201	32.5128	23.0783	215.318
Upstream	140	8.7038	6.605	11.7352	12.5772	6.3767	5.6912	5.6061	6.6801	6.1806	15.2305	10.288	8.9901	9.5008	9.8965	6.9824	6.7965	10.3996	9.132	10.8796	8.259	10.3779	14.1176	8.6468	11.9407	9.7089	10.6222	13.0892	9.3284	9.9994	7.5854	14.8577	9.1212	4.8163	1.8699	236.816
Upstream	141	5.4239	2.5134	2.9871	3.7972	5.6065	9.0891	6.0446	1.1458	3.9719	4.9532	6.6733	7.664	7.1606	5.4918	6.1729	6.0231	7.6275	7.4584	5.1807	7.7246	5.0669	9.9124	8.7864	9.5972	6.5142	8.2612	8.2928	11.3844	12.0009	11.9356	15.4321	17.1645	56.9225	56.7381	12.9056
Upstream	142	-13.3878	-11.8989	-12.1349	-10.7666	-9.6425	-9.6885	-11.8183	-13.978	-10.6365	-18.2384	-11.8354	-10.9651	-7.7978	-8.2639	-8.8782	-11.8806	-16.9144	-17.9772	-19.5152	-13.6003	-18.2035	-10.7864	-10.6099	-16.9817	-11.9549	-13.707	-18.7168	-12.3051	-15.0819	-13.6595	-10.8225	-17.021	-6.8411	-4.4026	-6.9366
Upstream	143	-3.6819	-1.9577	-1.7141	-3.6236	-3.5003	-1.48	-1.6657	-3.0746	-2.7274	-2.8957	-2.1345	-3.6044	-2.0633	-3.0675	-2.8175	-4.0774	-3.3046	-2.5455	0.8569	0.6639	-0.0287	-2.8459	-5.6289	-1.9099	-1.2712	-2.6852	-1.6977	-0.626	-2.2042	-3.2378	-5.3148	-3.4421	-1.1	-2.2078	-2.5204
Upstream	144	2.1163	2.7334	2.6453	3.5617	5.5097	4.6188	2.6213	3.5545	-1.5336	1.5106	4.164	5.4755	4.592	4.2826	3.1367	2.8341	3.0602	0.9117	3.4394	1.9345	0.312	0.9439	2.631	2.6587	1.7747	3.5891	3.4071	4.3418	2.7308	1.0808	0.2303	1.404	2.8356	0.0476	-10.2344
Upstream	145	1.3879	0.1088	3.2215	3.3563	2.8343	3.4161	1.5588	0.3798	0.8683	3.5374	3.6757	2.1539	-0.3351	-3.8584	1.0356	1.4476	3.5081	4.4516	4.3553	5.7292	4.0792	3.3389	4.0434	2.8824	7.4593	7.4943	4.8056	2.8352	2.2783	3.0813	3.2612	1.7007	2.0673	3.9985	4.9856
Upstream	146	-1.7554	-2.8169	-3.7281	-0.6273	-0.6026	0.0815	2.2037	0.7073	0.1108	-1.7188	0.0118	1.0207	2.7225	4.0752	2.3285	1.105	-0.0805	-0.4855	-0.8539	-0.7544	-0.826	-1.931	-1.5109	-0.0385	-0.3875	0.6584	3.1438	0.6671	-1.0449	-1.8606	-2.7173	-3.9933	-10.3848	-14.2764	-4.4546
Upstream	147	3.1245	1.2846	1.9758	2.2749	2.6634	2.5651	5.2243	5.0558	5.8533	0.9683	4.8348	7.1667	3.4767	2.3726	1.0857	0.9568	0.6998	2.2196	1.2164	1.7338	2.4646	5.9047	4.4526	4.1028	5.8147	4.7404	5.7578	5.2088	5.6125	4.4909	0.8431	-5.0937	-13.1495	-32.528	129.071
Upstream	148	5.2474	5.3593	9.2955	3.5768	4.8002	5.7685	7.4551	2.5097	3.8255	3.6075	3.8565	9.7259	8.1153	10.4237	4.8952	6.2122	6.2346	6.6189	7.4789	6.7343	9.6209	15.7251	15.2521	6.0296	5.1373	8.0712	9.0476	17.676	12.1568	20.2353	18.499	9.3392	7.984	5.1644	4.9265
Upstream	149	6.5199	6.1177	5.7202	5.4422	3.2205	3.9666	6.4393	6.4438	6.9883	5.8343	3.7098	1.9173	4.226	3.1172	6.2778	4.737	5.9533	4.6073	2.5933	2.6883	3.549	6.3185	6.2556	4.0497	4.5931	2.6422	2.6258	1.5504	2.7254	4.3429	3.8785	4.2504	4.212	-4.7912	-26.4577
Upstream	150	8.1229	4.5322	14.336	10.7475	10.6665	6.3187	9.8449	7.7586	9.1989	10.2766	9.9124	8.7	9.4266	9.6014	8.0087	10.1528	5.3336	5.8035	11.0003	11.0001	10.3723	6.8173	6.8979	8.3156	10.2095	6.5667	2.6865	6.8759	6.7611	6.9075	7.9315	11.5273	3.5929	7.7582	53.4312
Upstream	151	11.6582	18.1921	14.4482	13.7545	8.9377	10.1221	9.1427	9.6488	11.7246	7.2147	11.8073	14.7582	17.8953	21.9826	15.0179	9.6455	12.9996	11.5131	16.7726	14.3251	16.1366	16.859	14.8418	9.8851	10.4638	11.8949	10.1994	8.1233	7.2961	13.2287	14.1885	23.4798	35.1472	36.1044	69.38
Upstream	152	16.9924	17.6098	16.245	14.1268	19.2242	20.7724	16.5977	14.7159	15.3983	16.8998	19.5043	14.1198	21.7864	35.5739	32.8645	28.7013	24.3519	23.5783	29.5892	19.204	21.2654	19.5095	19.419	28.4261	26.1739	27.1813	35.5671	23.9737	50.2994	25.3949	25.2799	33.1296	22.1707	45.8389	30.7672
Upstream	153	13.5585	11.7092	14.4504	21.1091	16.0764	26.378	21.7909	21.3671	12.7325	14.5985	13.5577	16.186	24.0718	16.3505	14.5066	13.205	15.9425	15.4553	18.7551	21.2215	23.9519	17.089	18.7686	17.0348	21.2239	20.0367	22.3574	17.1551	14.1159	15.6805	21.4636	27.6901	25.6576	35.9795	62.1204
Upstream	154	18.3113	14.852	20.6484	19.9039	21.1368	22.2565	21.639	15.4017	20.2143	27.3378	22.1137	29.0526	15.7663	23.2934	32.0375	17.5264	25.5118	17.0346	17.9211	18.0442	21.2031	21.6183	24.4129	23.8484	27.9189	29.9706	25.5768	19.8744	31.5504	31.2916	41.7538	30.559	61.4284	68.1266	63.7706
Upstream	155	-2.0939	-3.3184	-1.5912	-2.3851	-1.582	0.3378	0.848	0.2847	-2.4343	-0.4091	-0.8661	-2.0453	-2.0528	1.2462	-1.5203	-4.1612	-2.552	-0.7171	0.0395	0.2614	0.1294	0.5524	0.205	-0.7097	-1.1514	-3.173	-2.6773	-2.8197	-3.1832	-5.1421	-4.0863	-3.4704	-4.3373	-3.7377	-6.3059
Upstream	156	2.0859	5.0635	6.1449	6.0761	4.107	2.3502	1.9779	3.1518	4.2029	5.1162	2.0826	3.8346	3.501	7.9508	9.2435	7.7887	5.9605	4.6572	4.1449	2.9309	3.4176	3.5358	4.1758	3.6635	2.7144	3.4633	8.0119	6.4779	8.1296	6.7075	9.5243	19.3166	44.3789	79.333	19.358
